# Supplementary material
Source: PubMed Central journal article supplement (PMC7312157)

Plot of 0.2 against 0.5 seconds of exposure at 0% attenuation

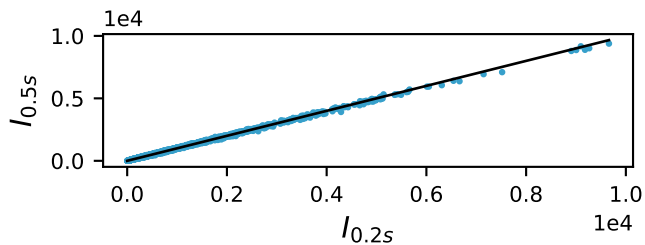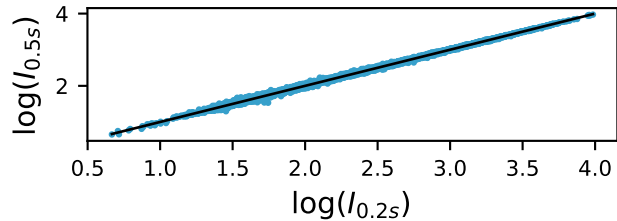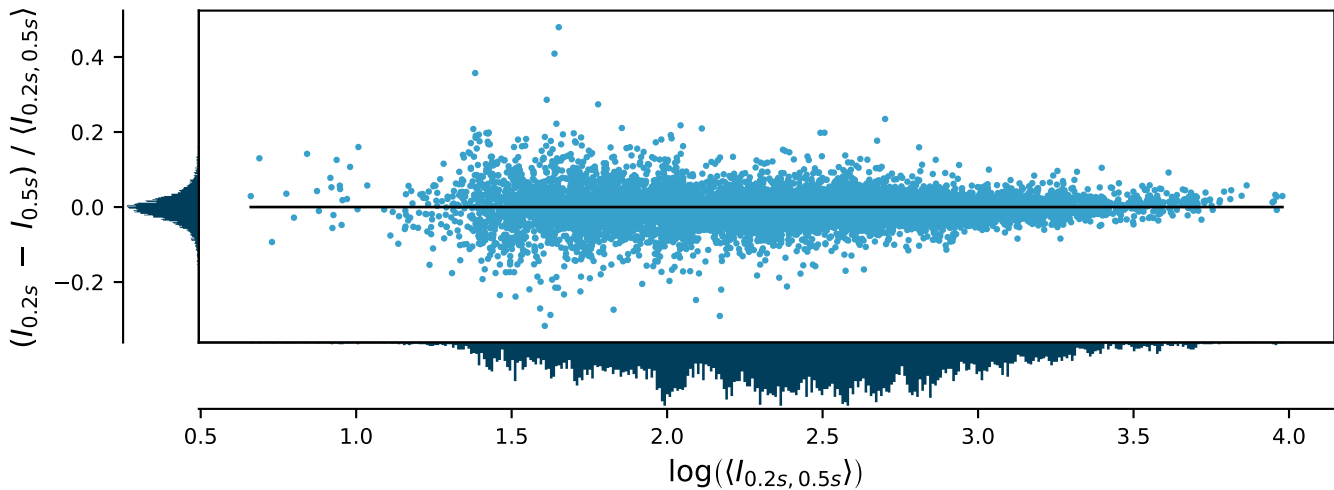

Plot of 0.2 against 1.0 seconds of exposure at 0% attenuation

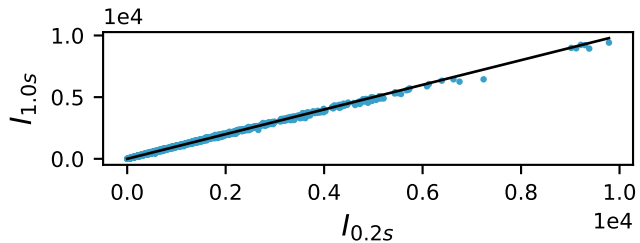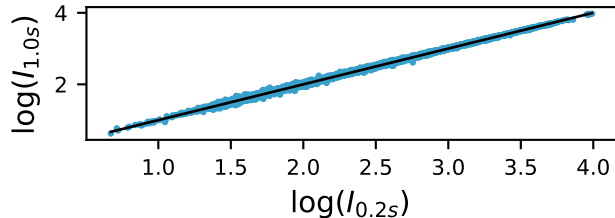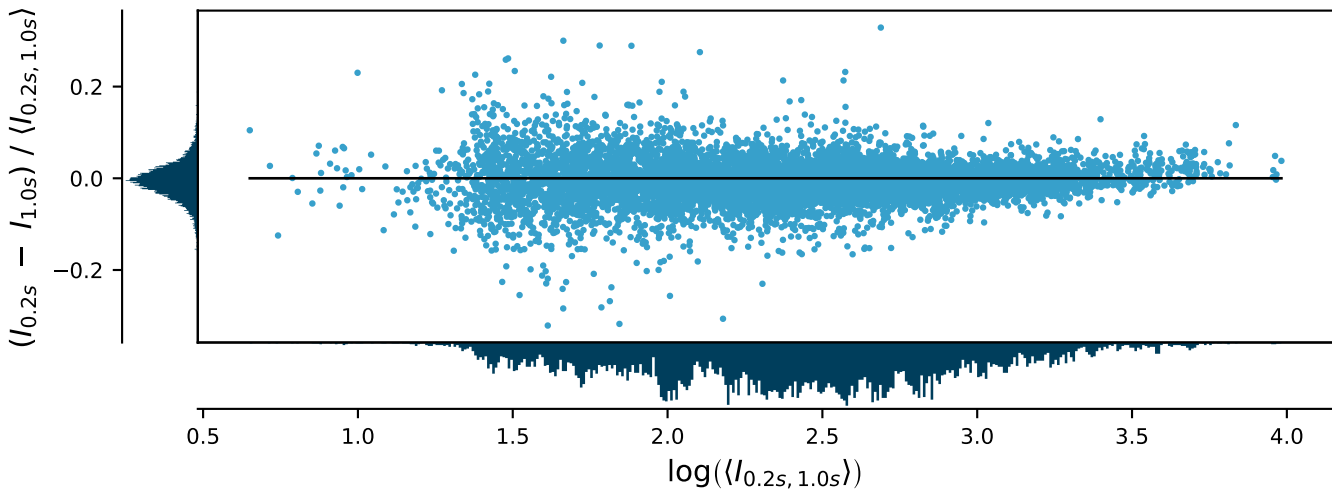

Plot of 0.5 against 1.0 seconds of exposure at 0% attenuation

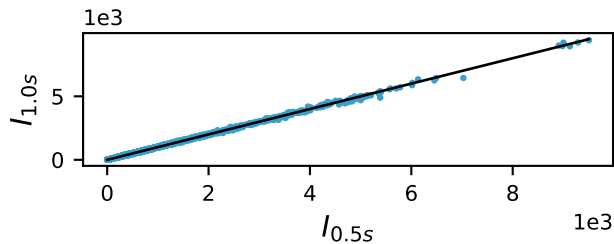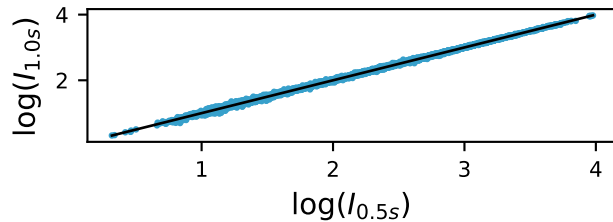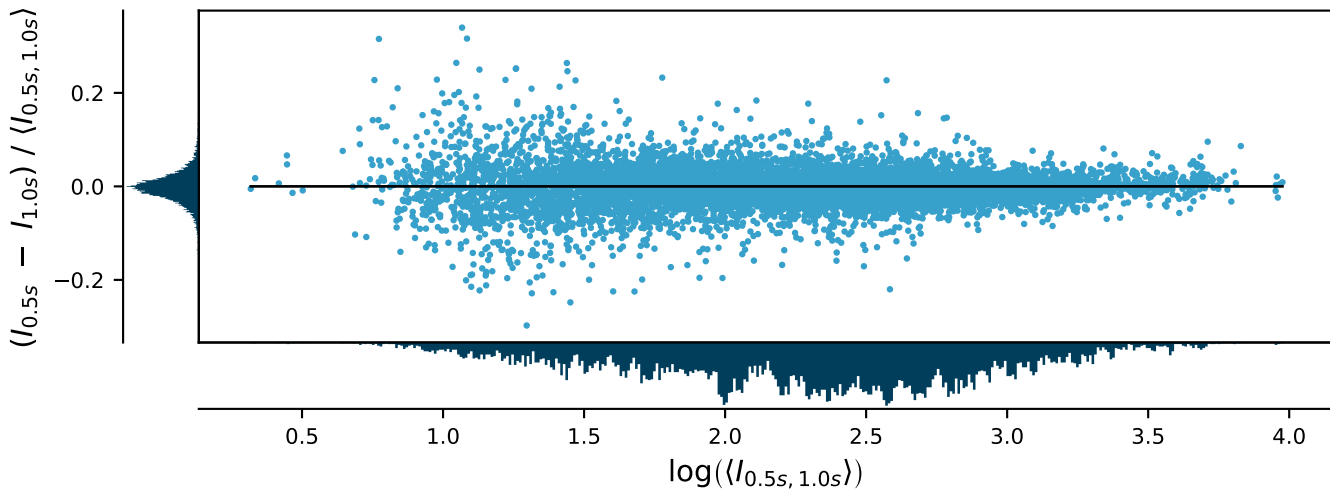

Plot of 0.2 against 0.5 seconds of exposure at 35% attenuation

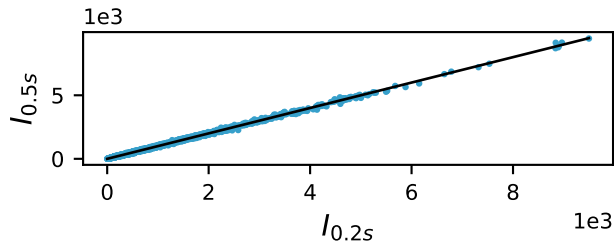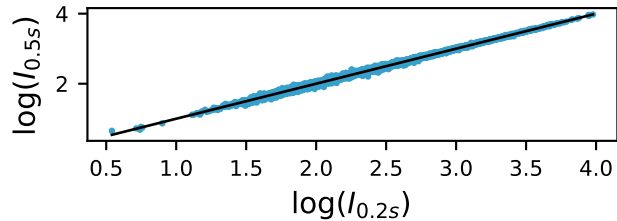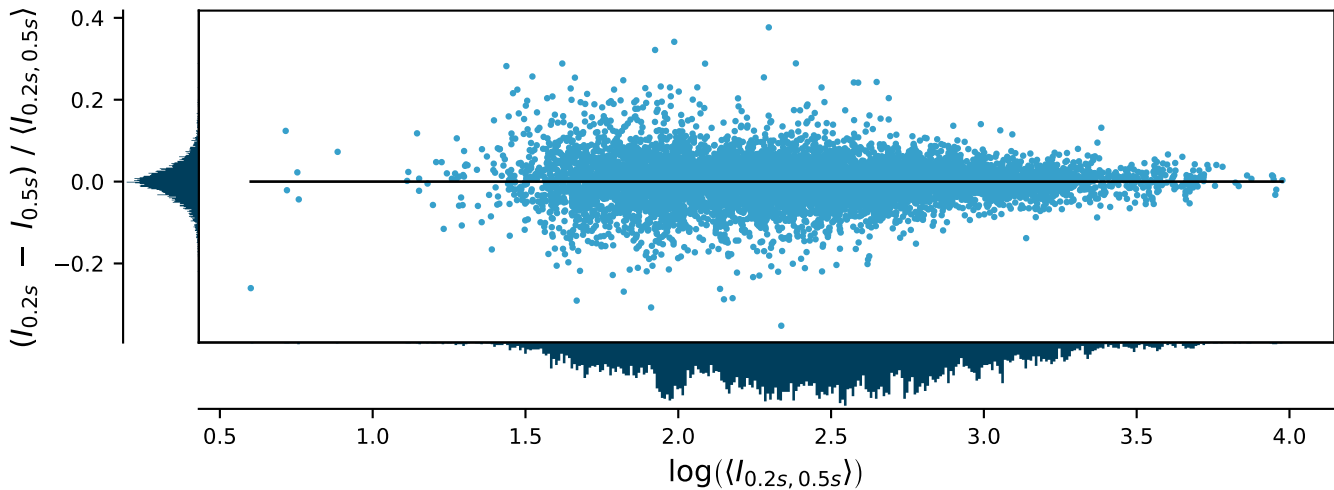

Plot of 0.2 against 1.0 seconds of exposure at 35% attenuation

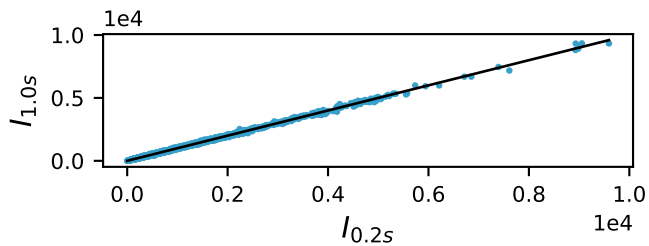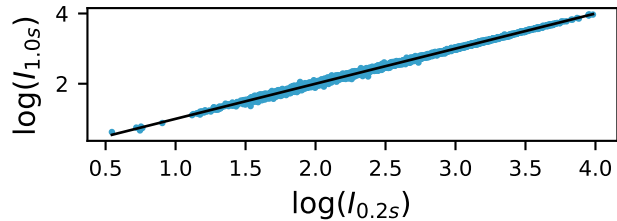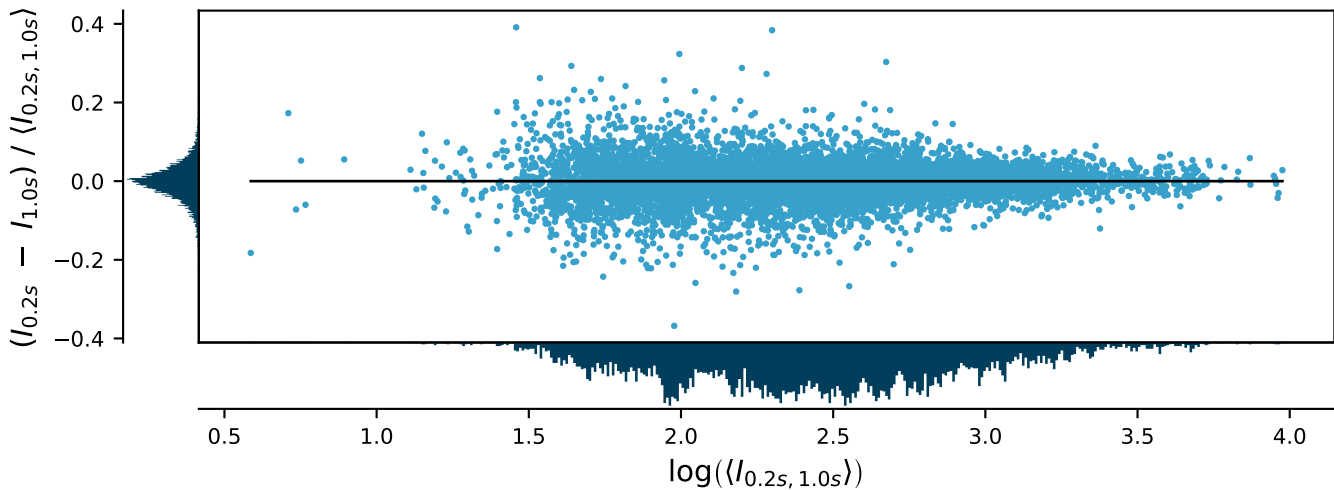

Plot of 0.2 against 2.0 seconds of exposure at 35% attenuation

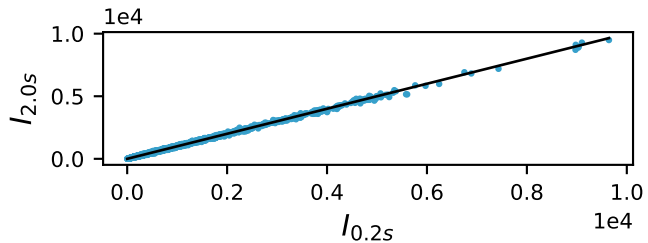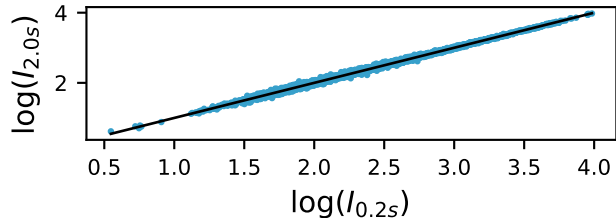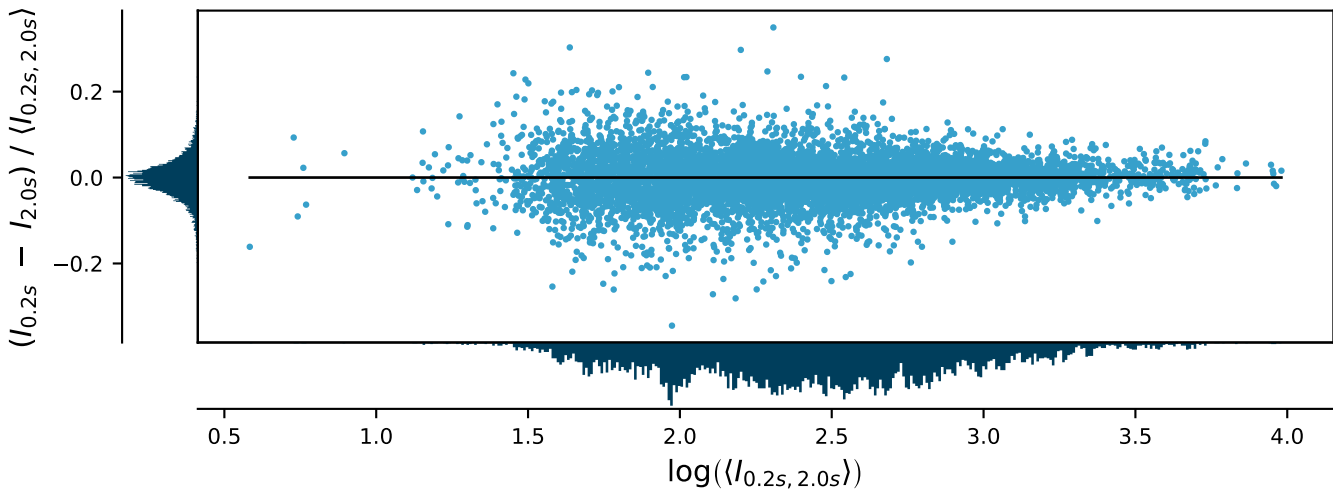

Plot of 0.5 against 1.0 seconds of exposure at 35% attenuation

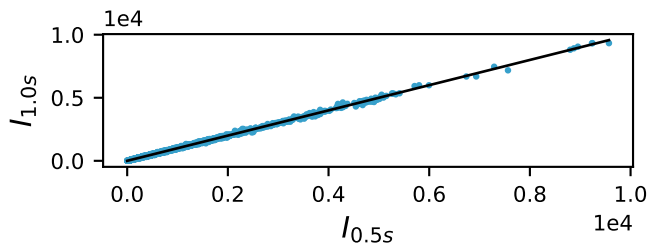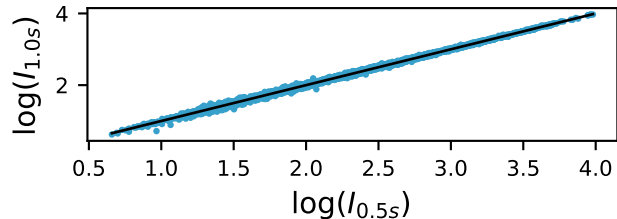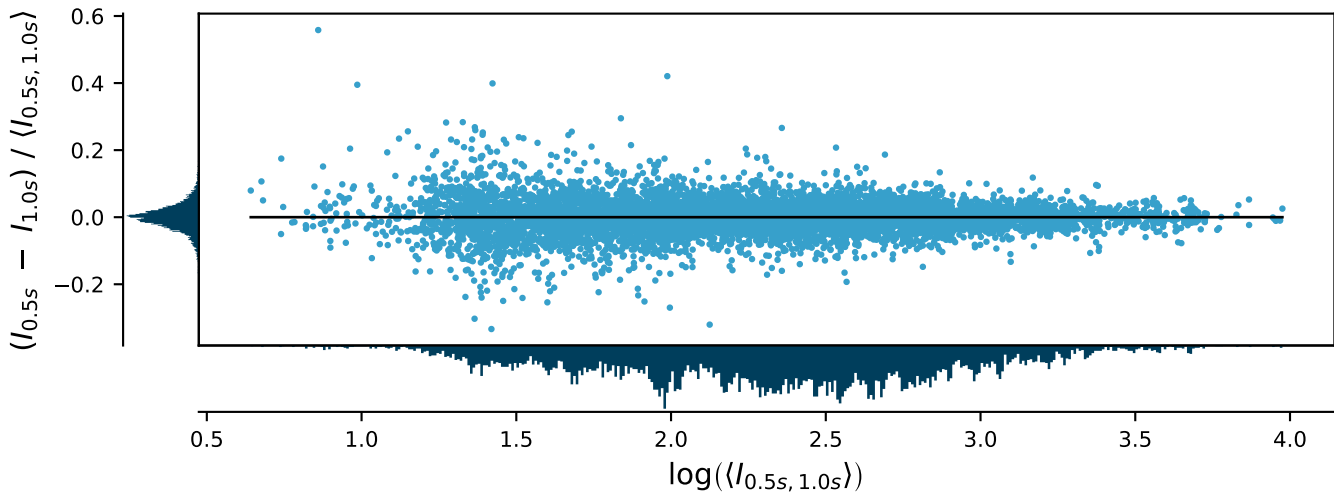

Plot of 0.5 against 2.0 seconds of exposure at 35% attenuation

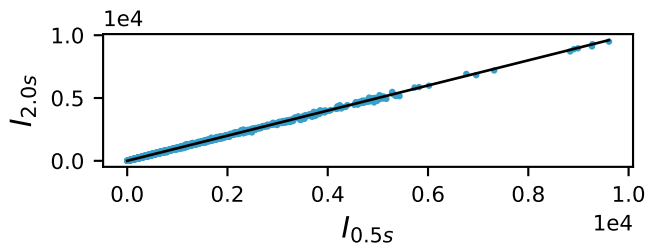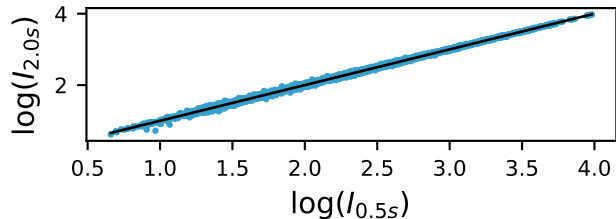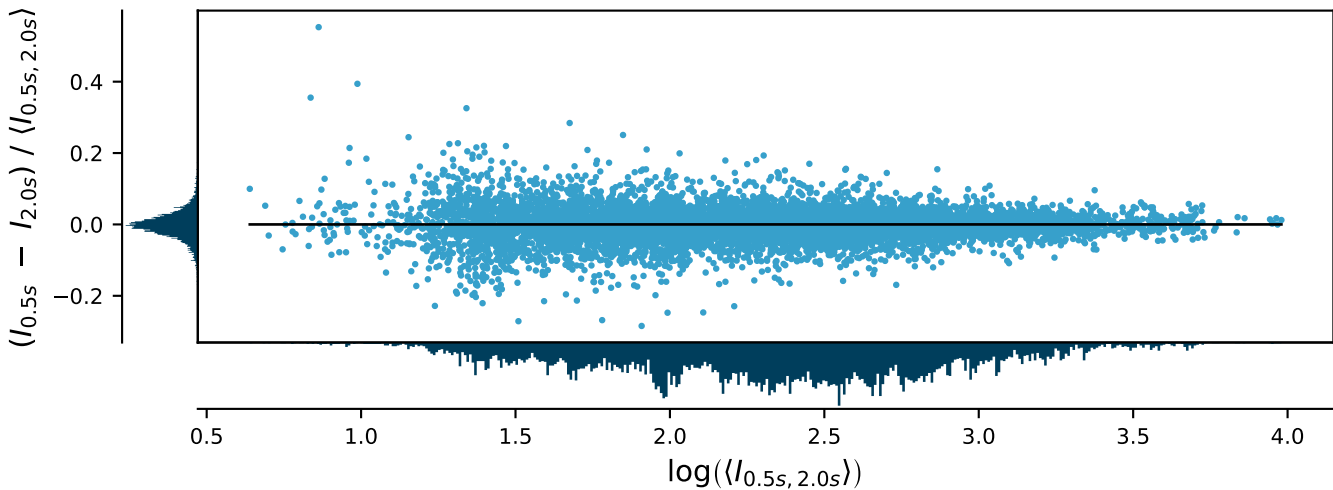



Plot of 1.0 against 2.0 seconds of exposure at 35% attenuation

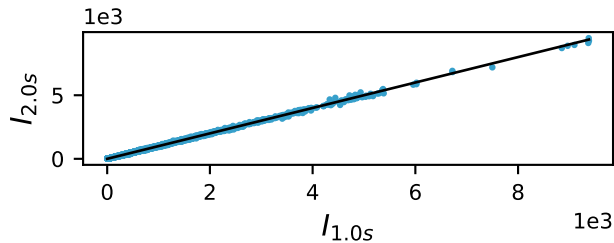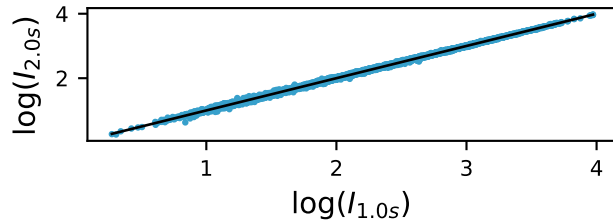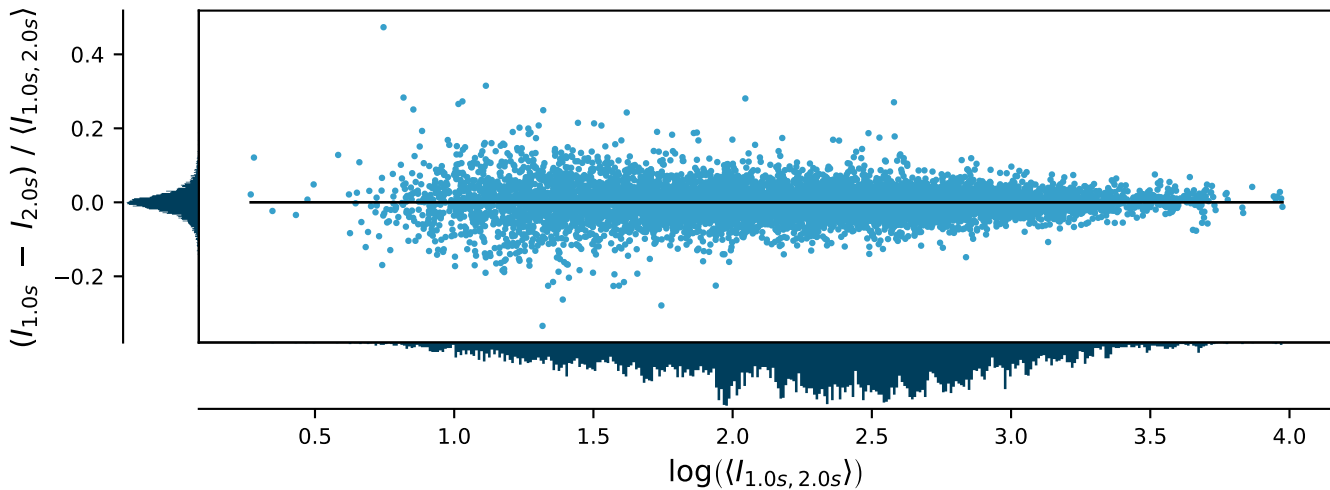

Plot of 0.2 against 0.5 seconds of exposure at 69% attenuation

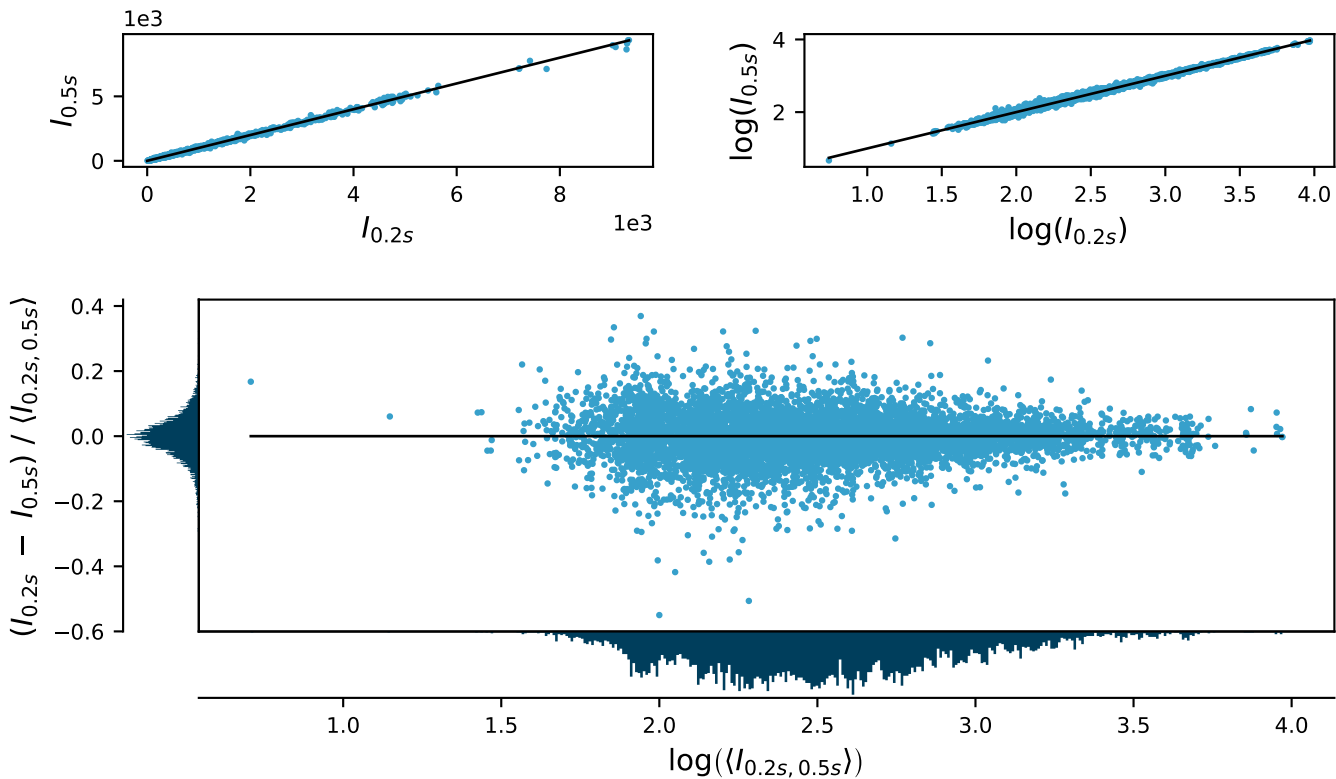

Plot of 0.2 against 1.0 seconds of exposure at 69% attenuation

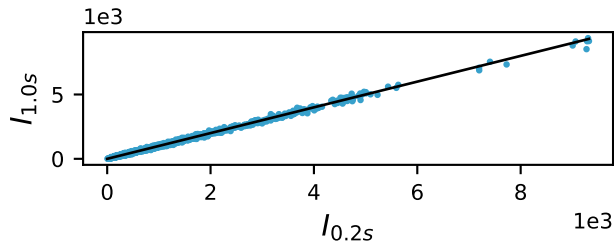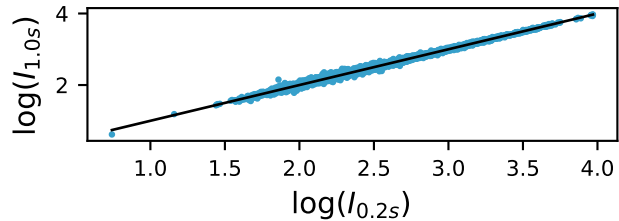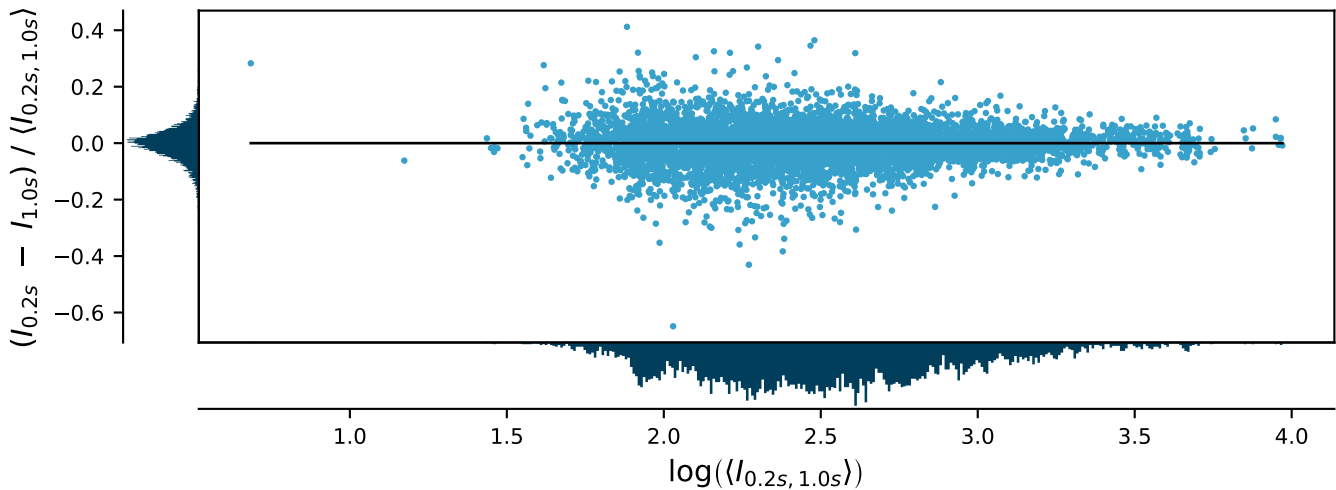

Plot of 0.2 against 2.0 seconds of exposure at 69% attenuation

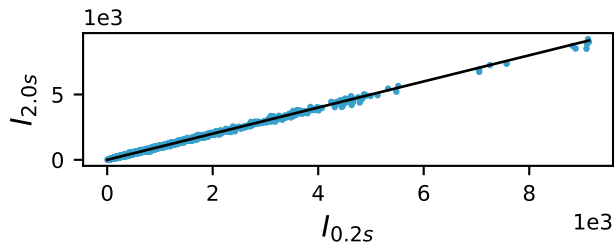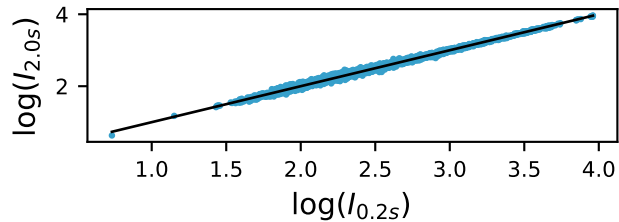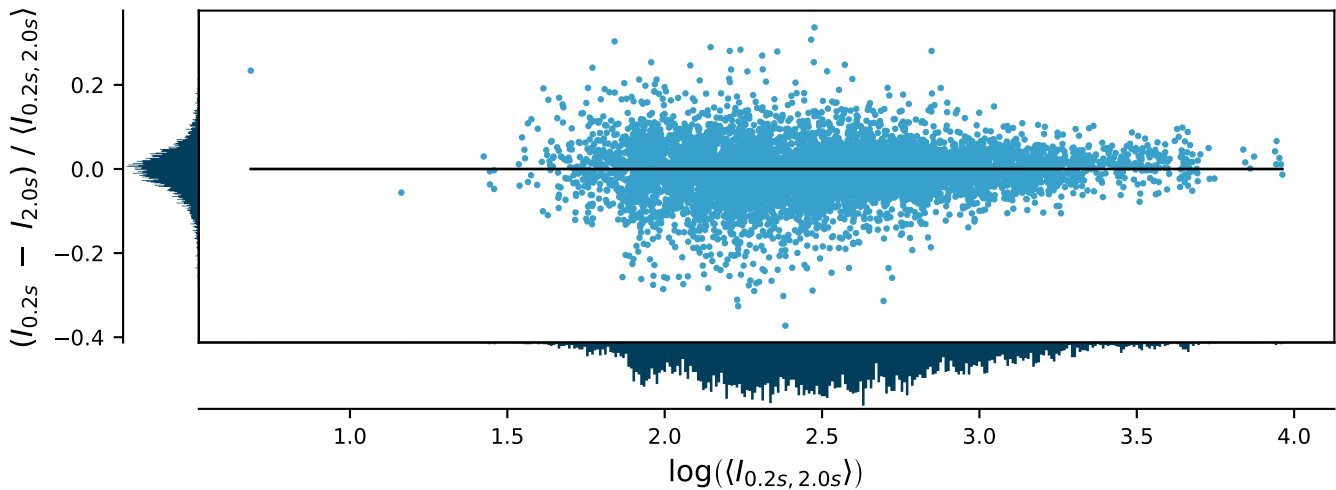

Plot of 0.5 against 1.0 seconds of exposure at 69% attenuation

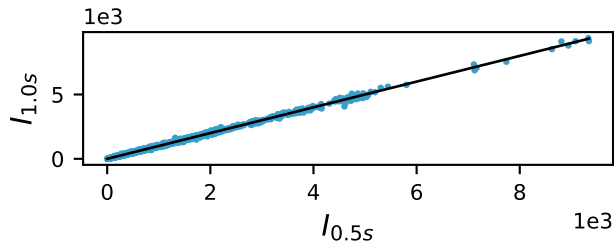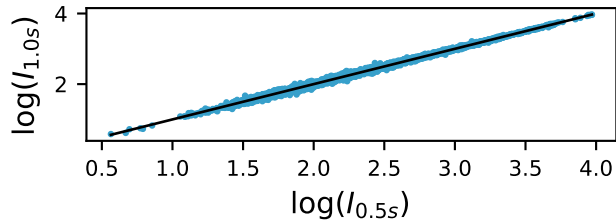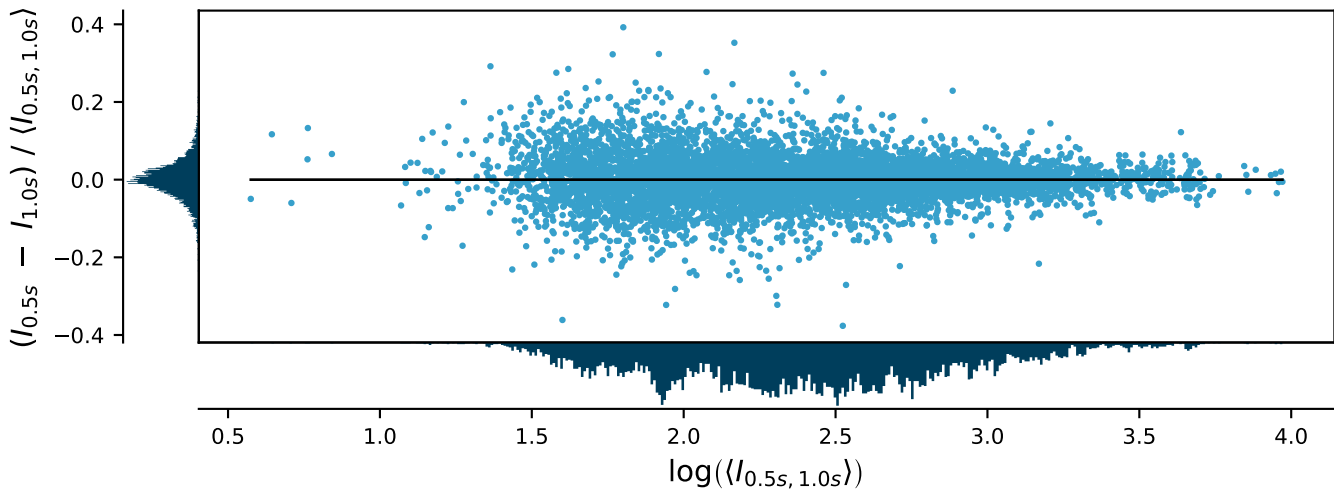

Plot of 0.5 against 2.0 seconds of exposure at 69% attenuation

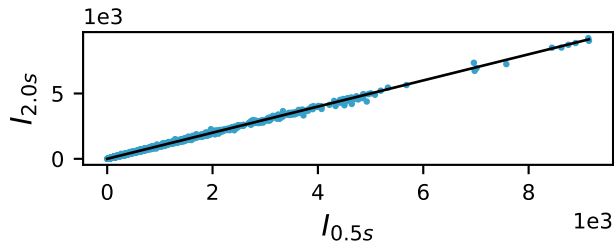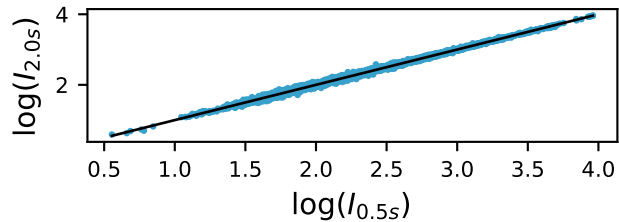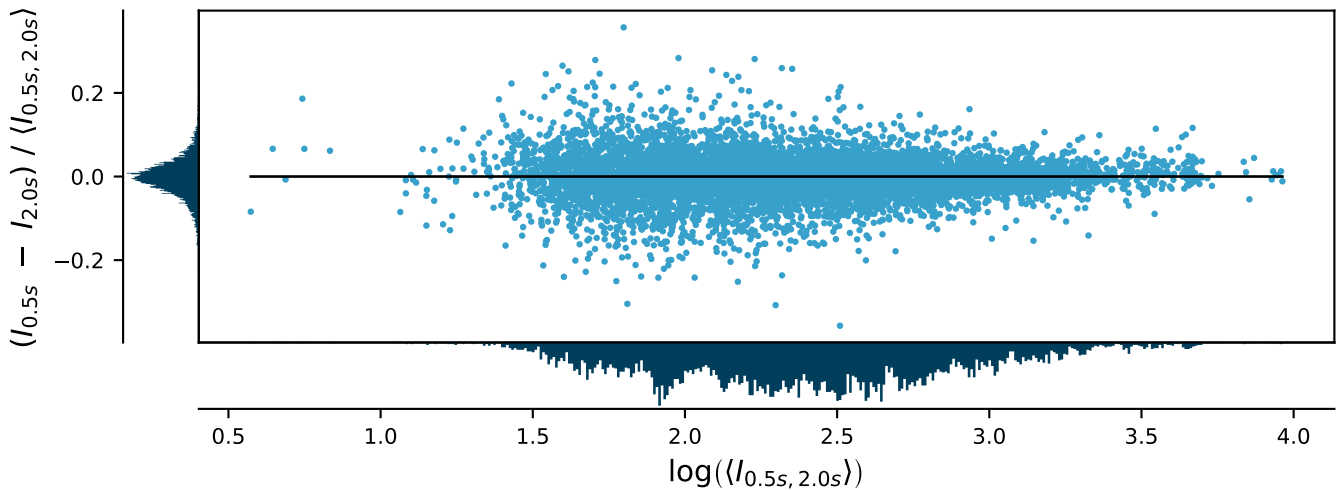

Plot of 1.0 against 2.0 seconds of exposure at 69% attenuation

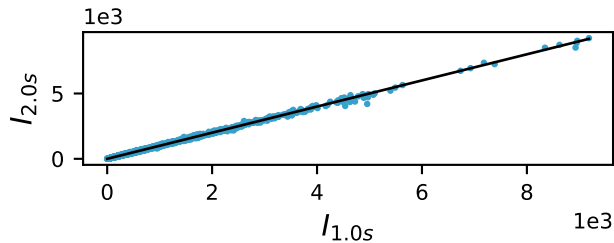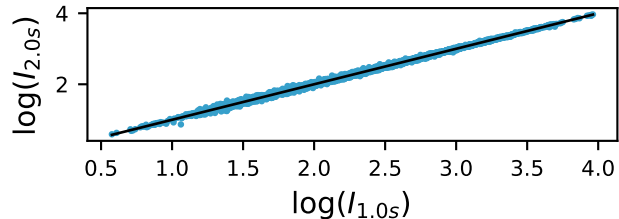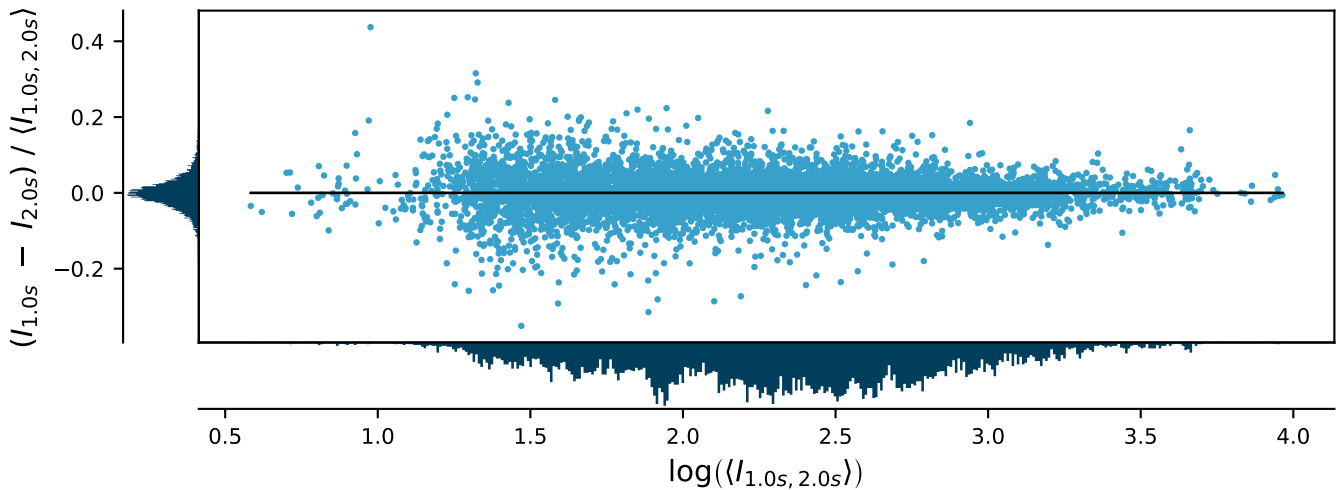

Plot of 0.2 against 0.5 seconds of exposure at 88% attenuation

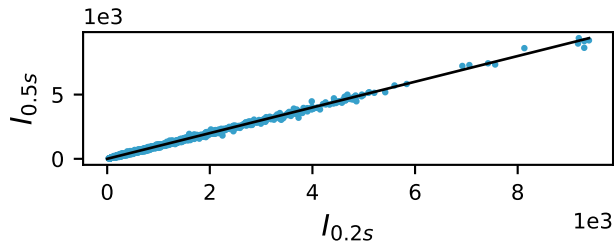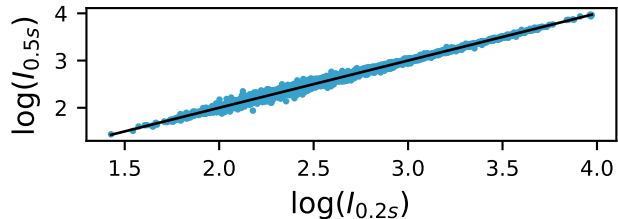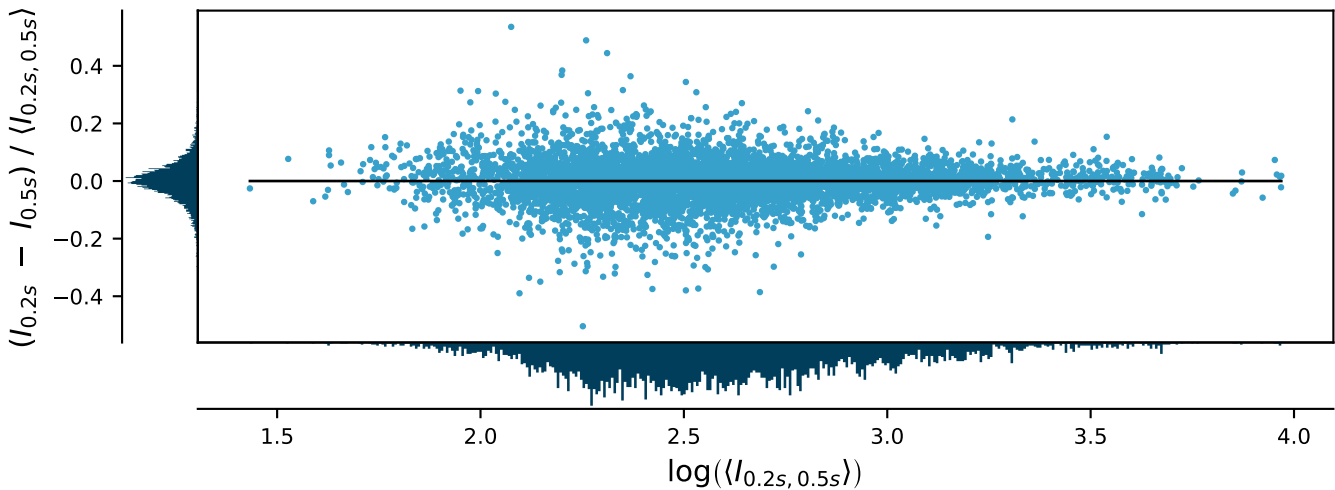



Plot of 0.2 against 1.0 seconds of exposure at 88% attenuation

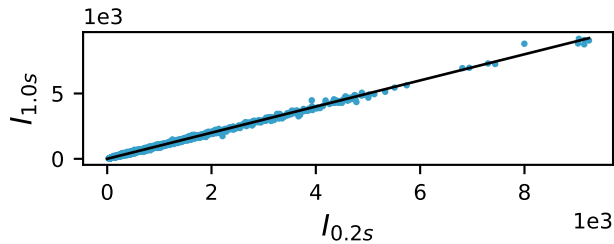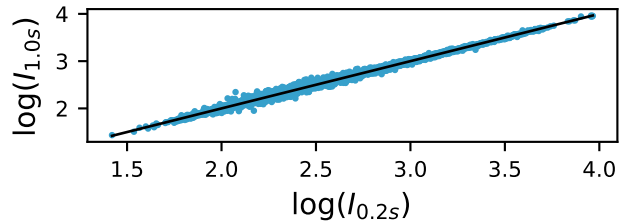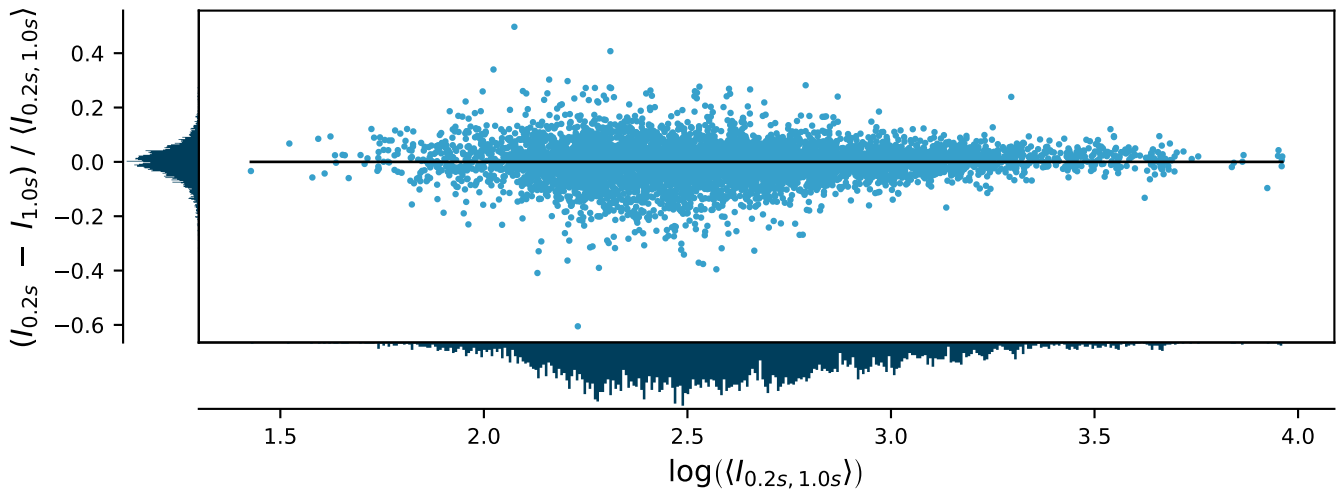

Plot of 0.2 against 2.0 seconds of exposure at 88% attenuation

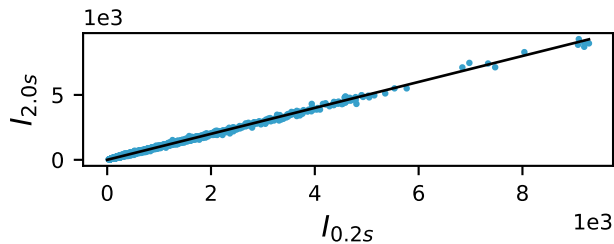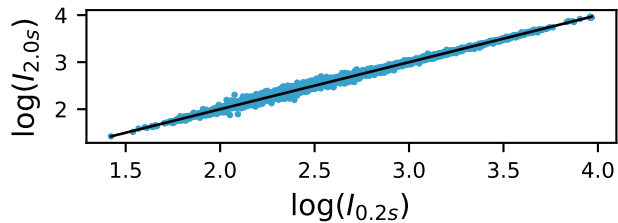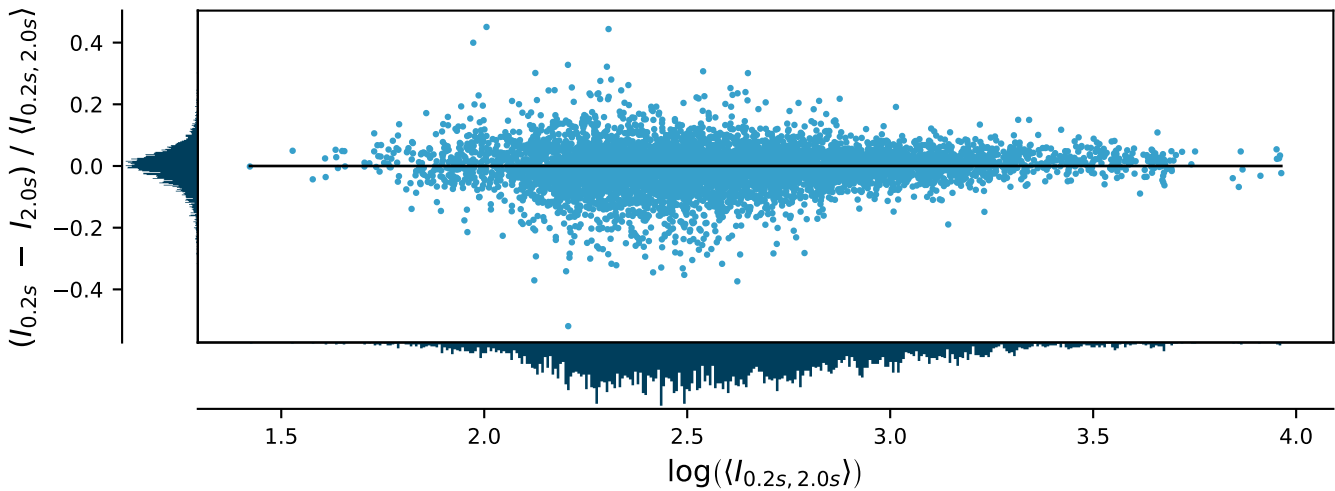

Plot of 0.5 against 1.0 seconds of exposure at 88% attenuation

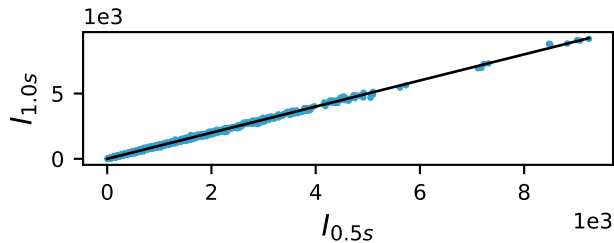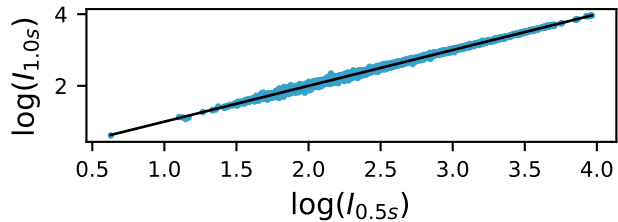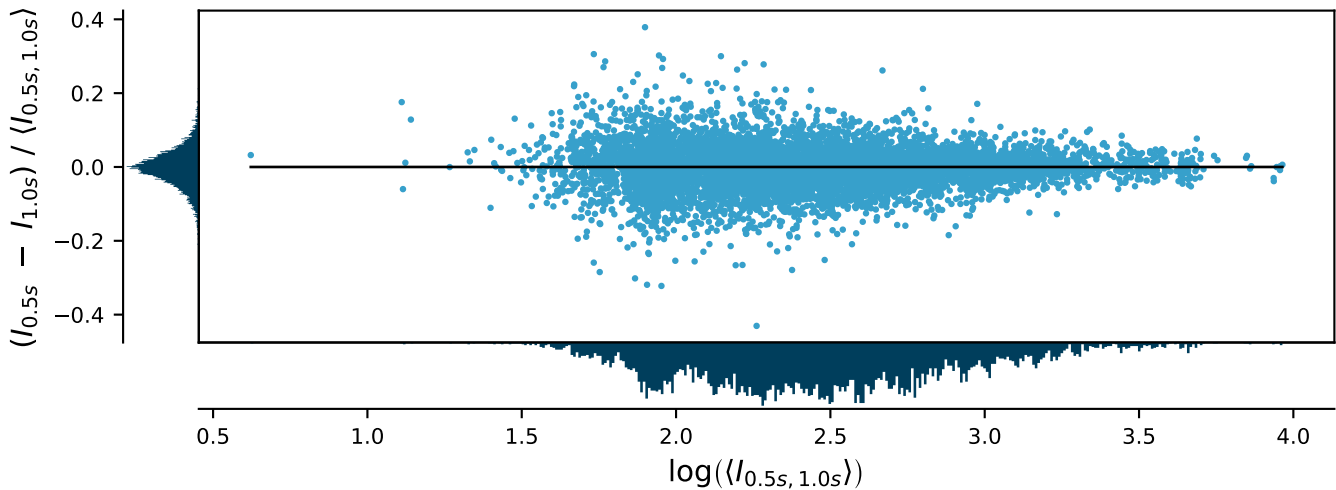

Plot of 0.5 against 2.0 seconds of exposure at 88% attenuation

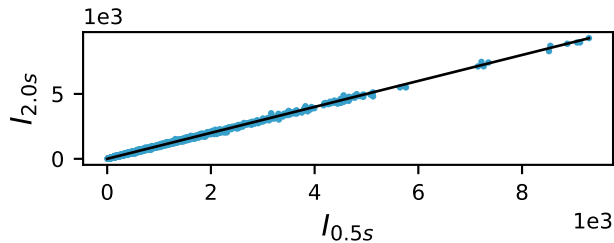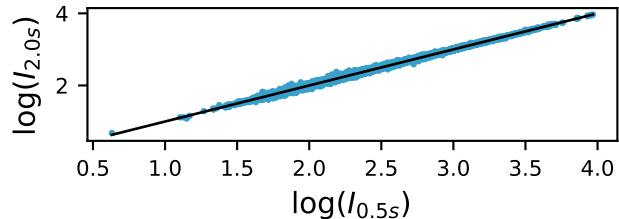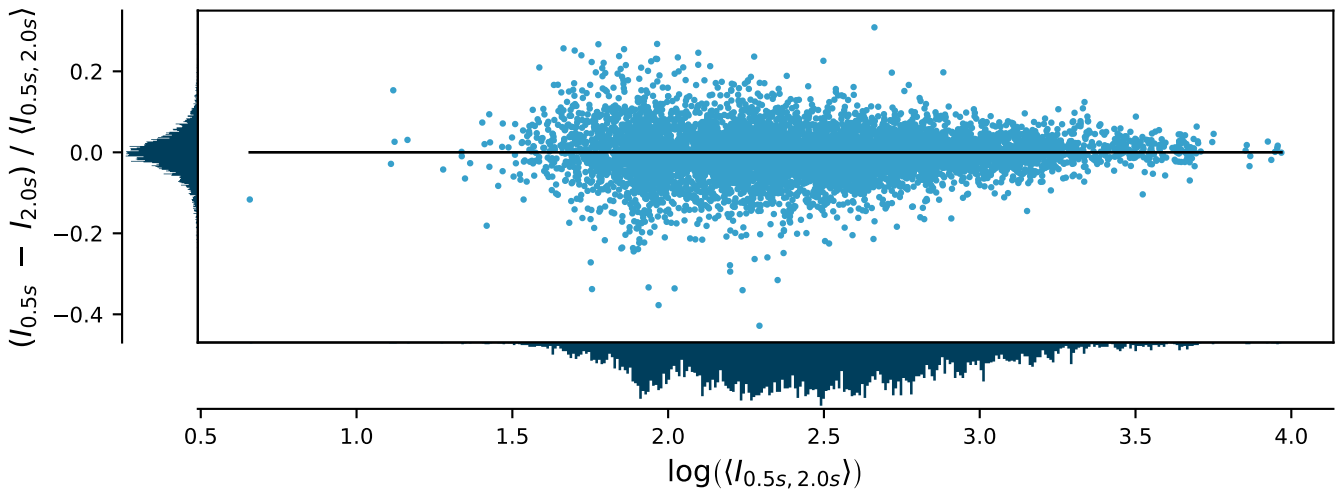

Plot of 1.0 against 2.0 seconds of exposure at 88% attenuation

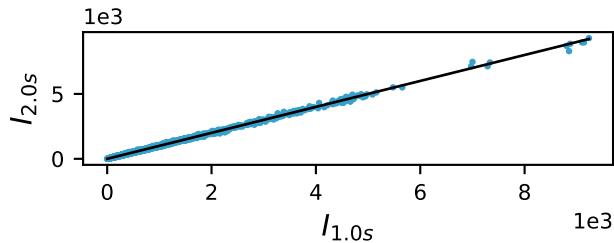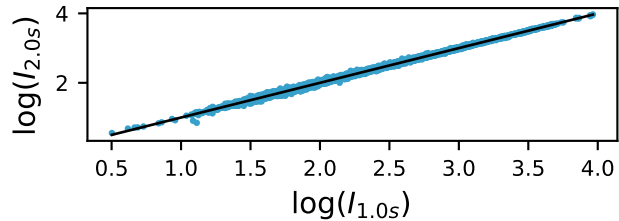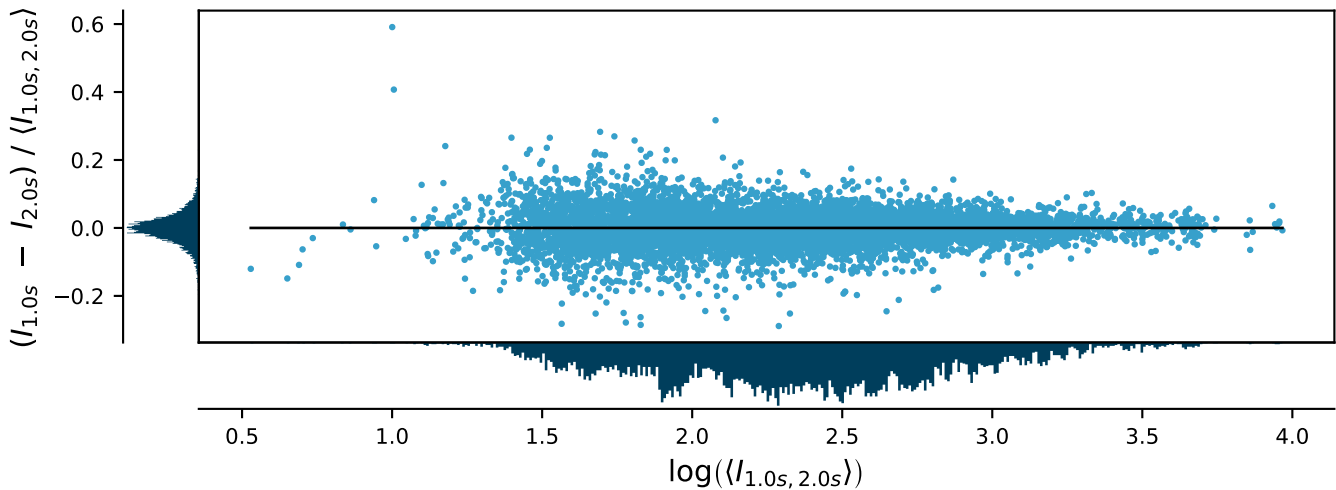

Supplement: j-53-00635-sup4.pdf [file j-53-00635-sup4.pdf]
