# Supplementary material
Source: PubMed Central journal article supplement (PMC7312157)

Plot of 35% against 0% attenuation at an exposure time of 0.2 seconds

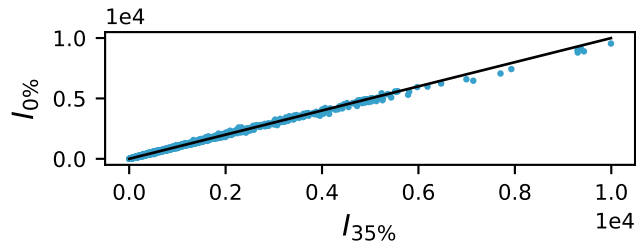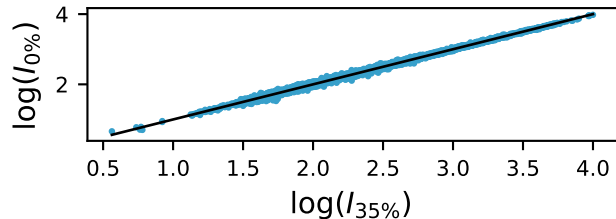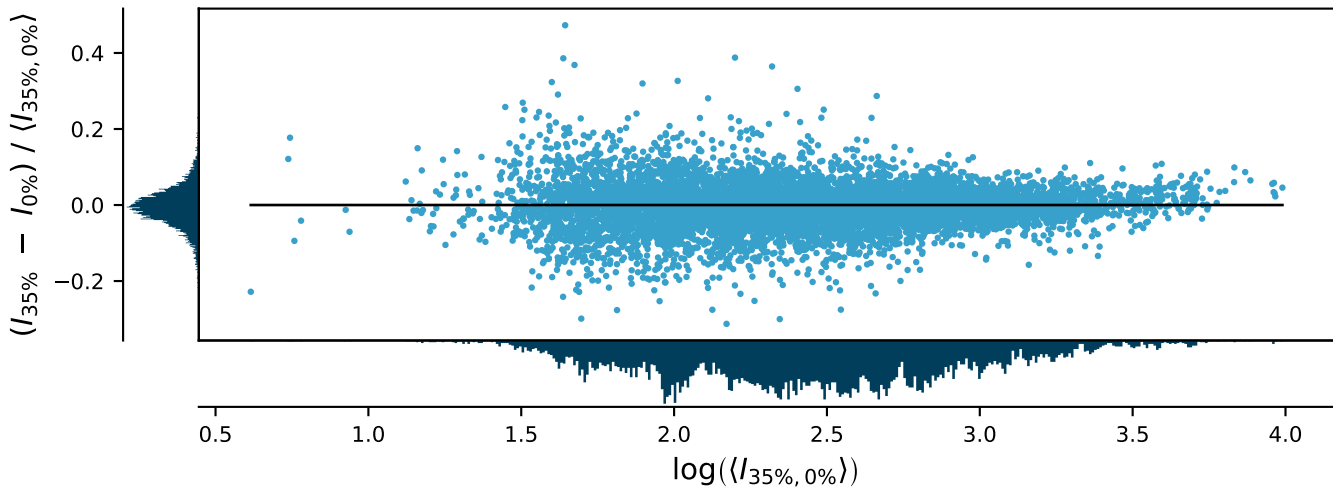

Plot of 69% against 0% attenuation at an exposure time of 0.2 seconds

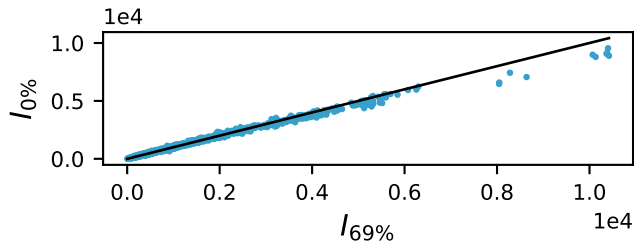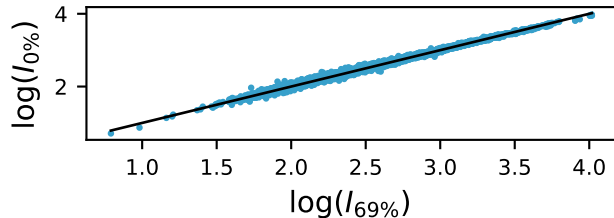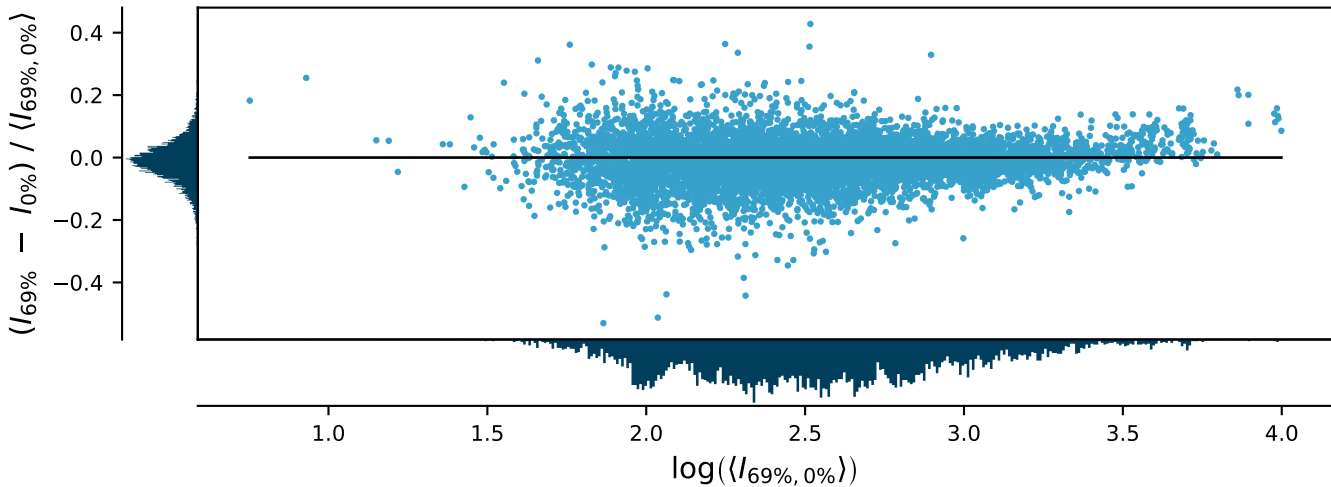

Plot of 69% against 35% attenuation at an exposure time of 0.2 seconds

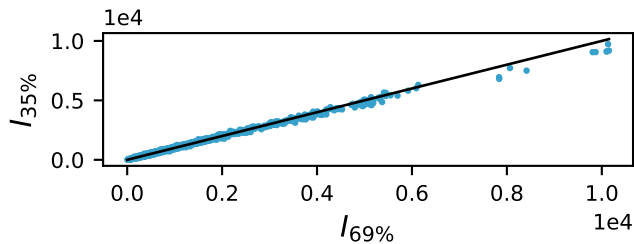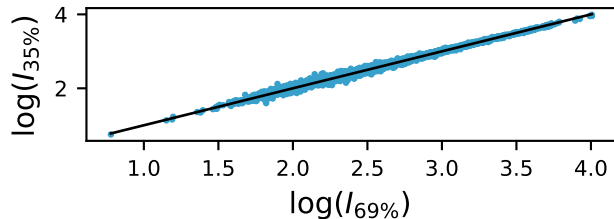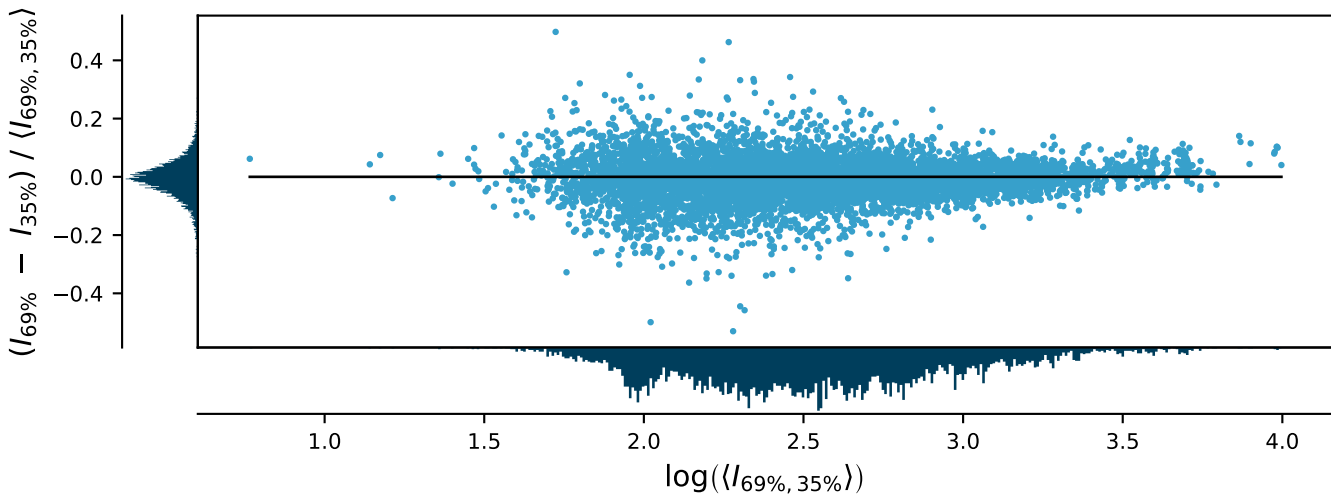

Plot of 88% against 0% attenuation at an exposure time of 0.2 seconds

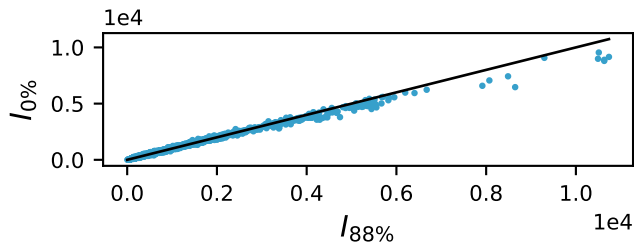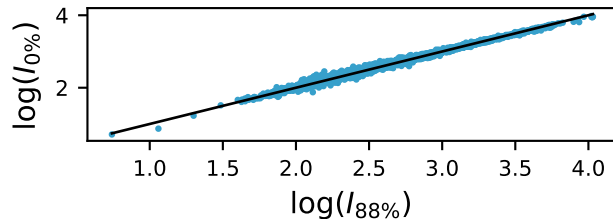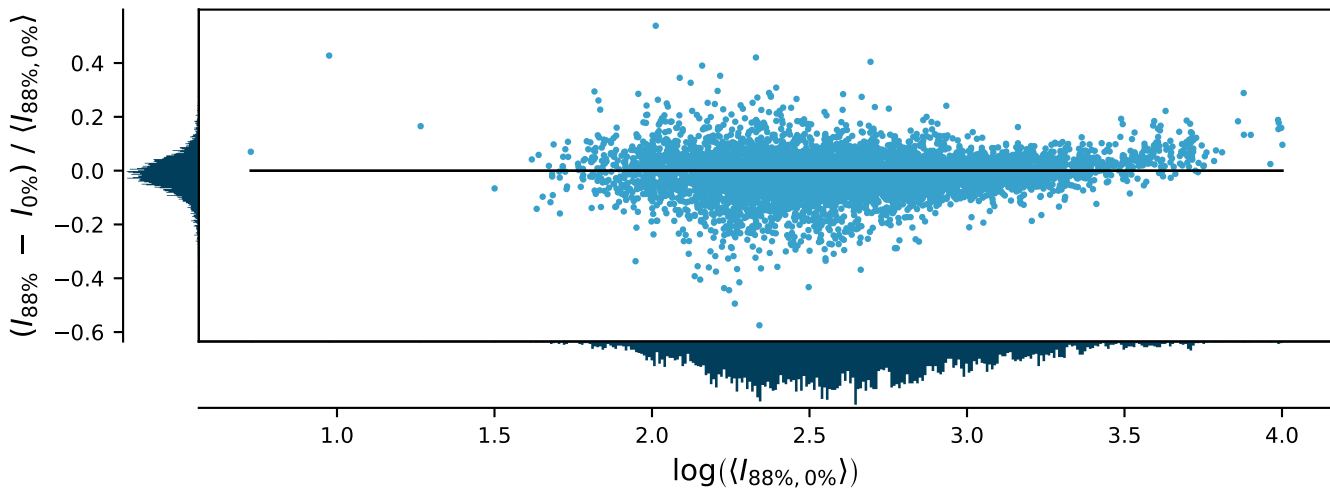

Plot of 88% against 35% attenuation at an exposure time of 0.2 seconds

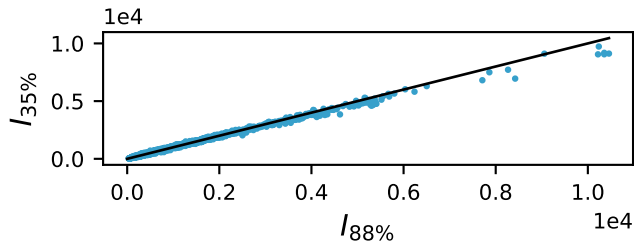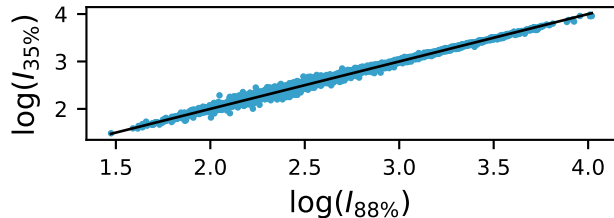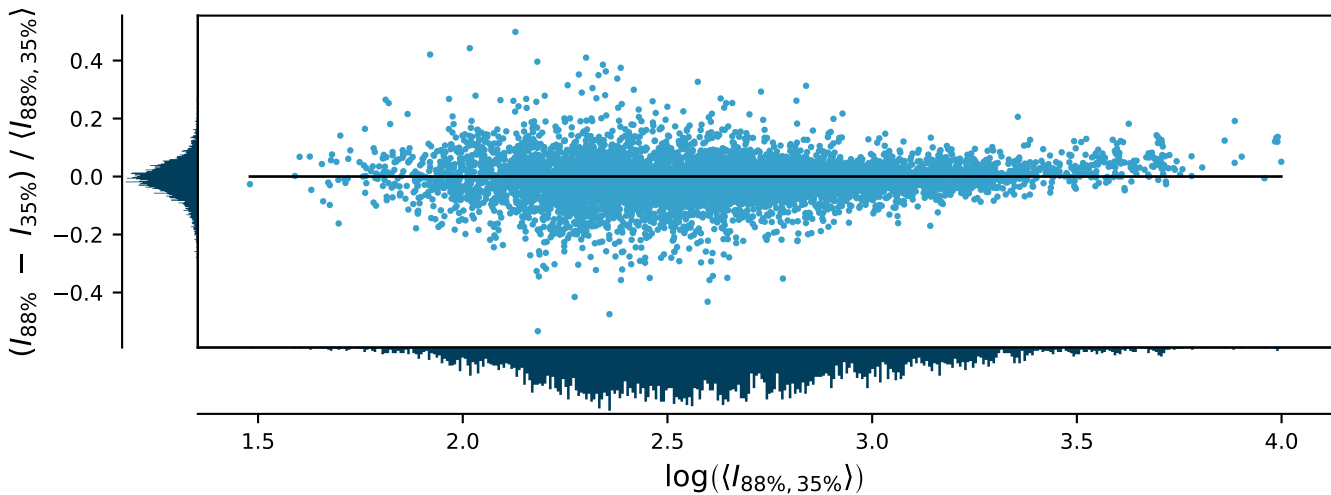

Plot of 88% against 69% attenuation at an exposure time of 0.2 seconds

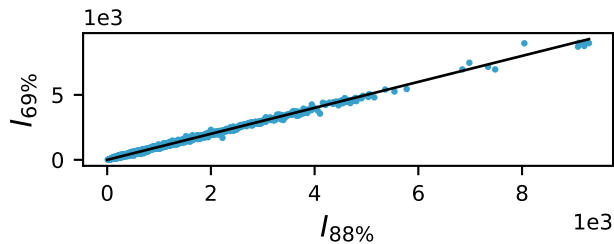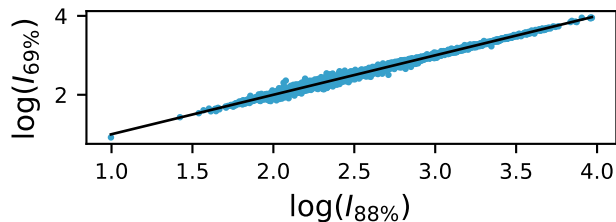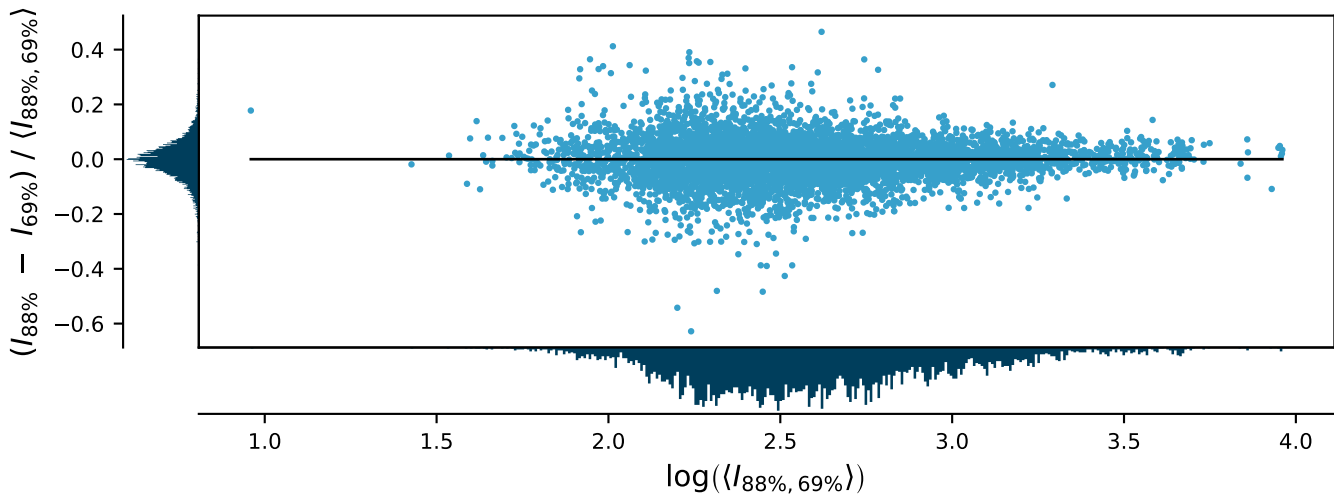

Plot of 35% against 0% attenuation at an exposure time of 0.5 seconds

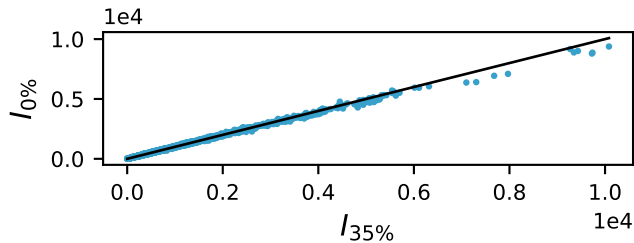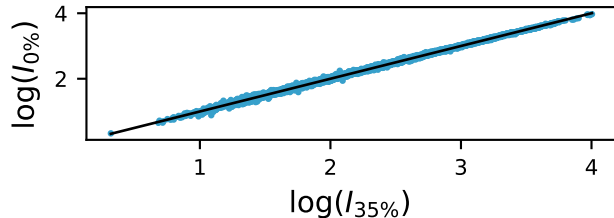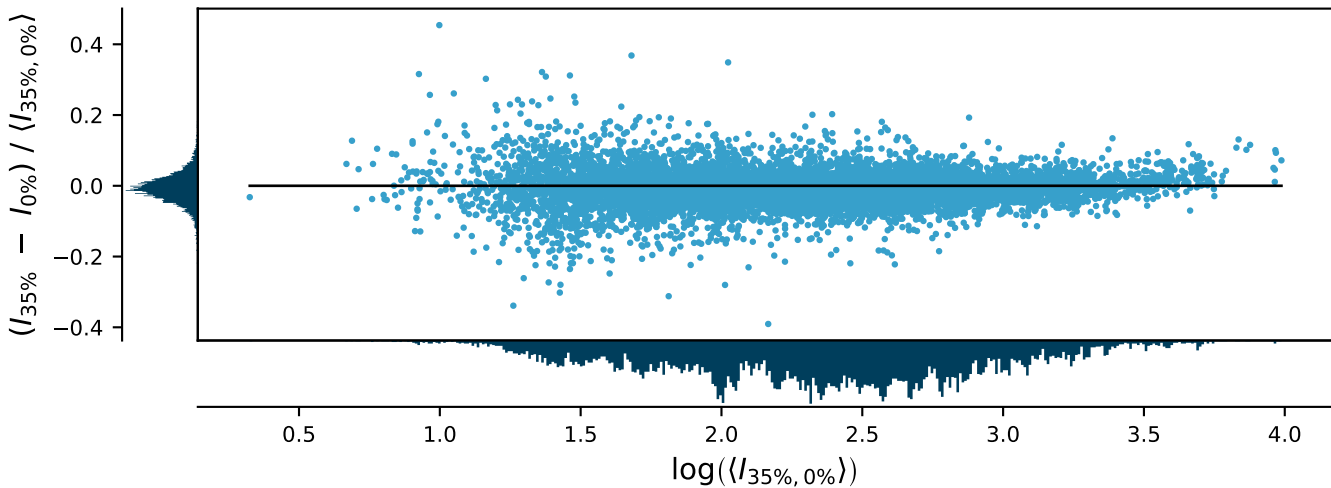

Plot of 69% against 0% attenuation at an exposure time of 0.5 seconds

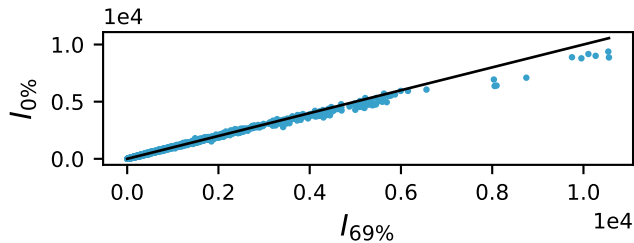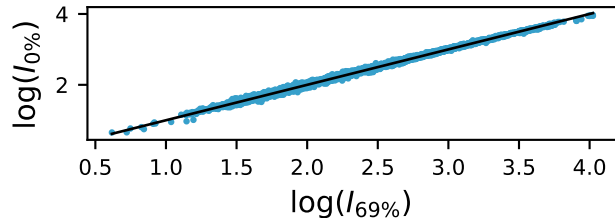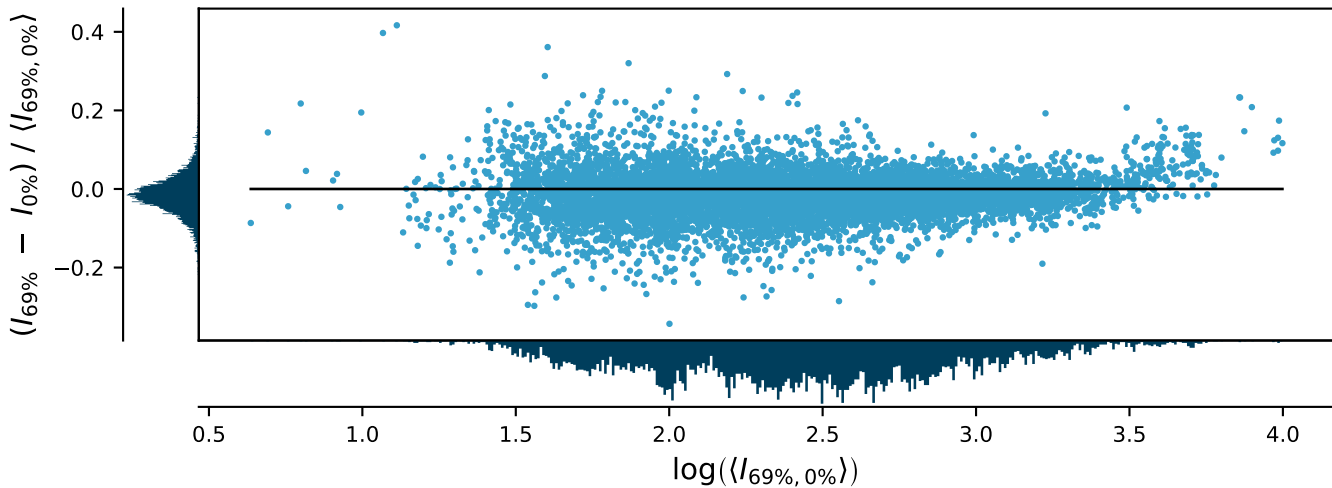



Plot of 69% against 35% attenuation at an exposure time of 0.5 seconds

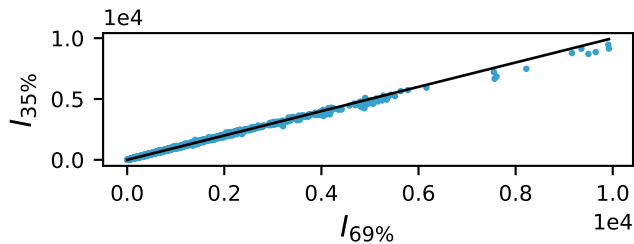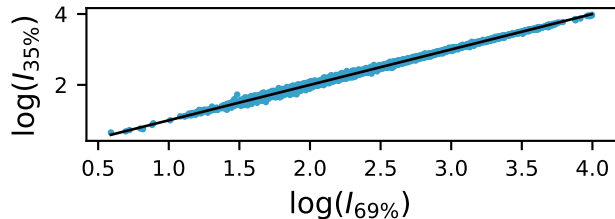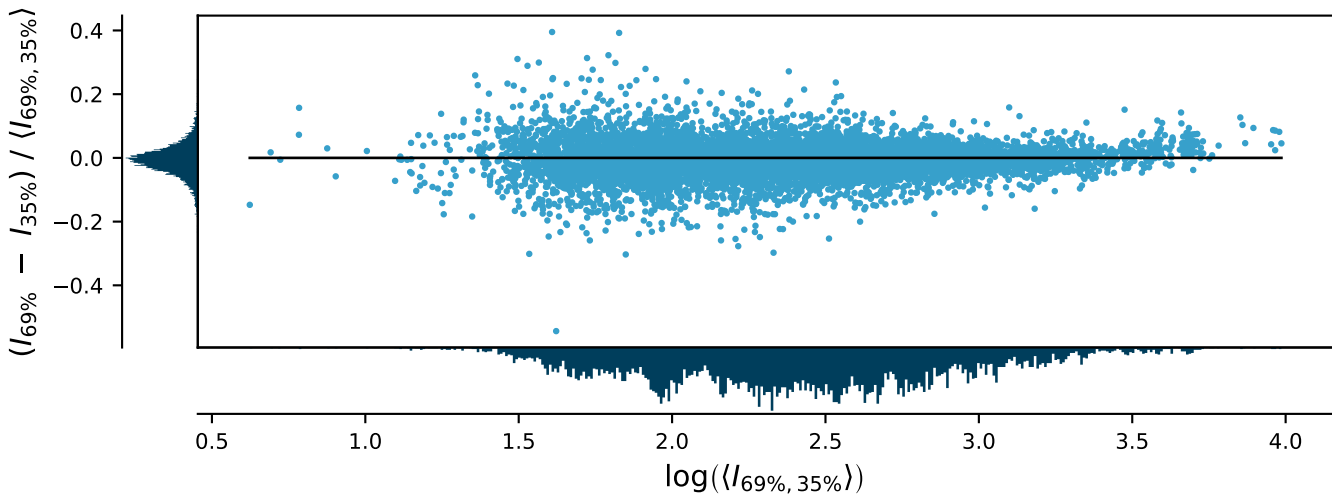

Plot of 88% against 0% attenuation at an exposure time of 0.5 seconds

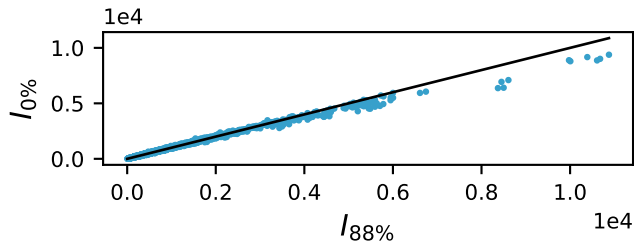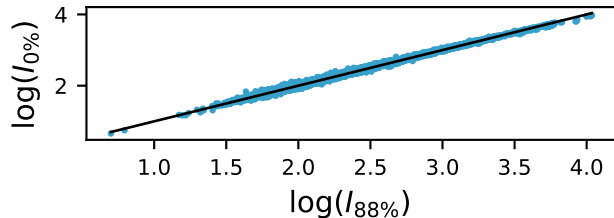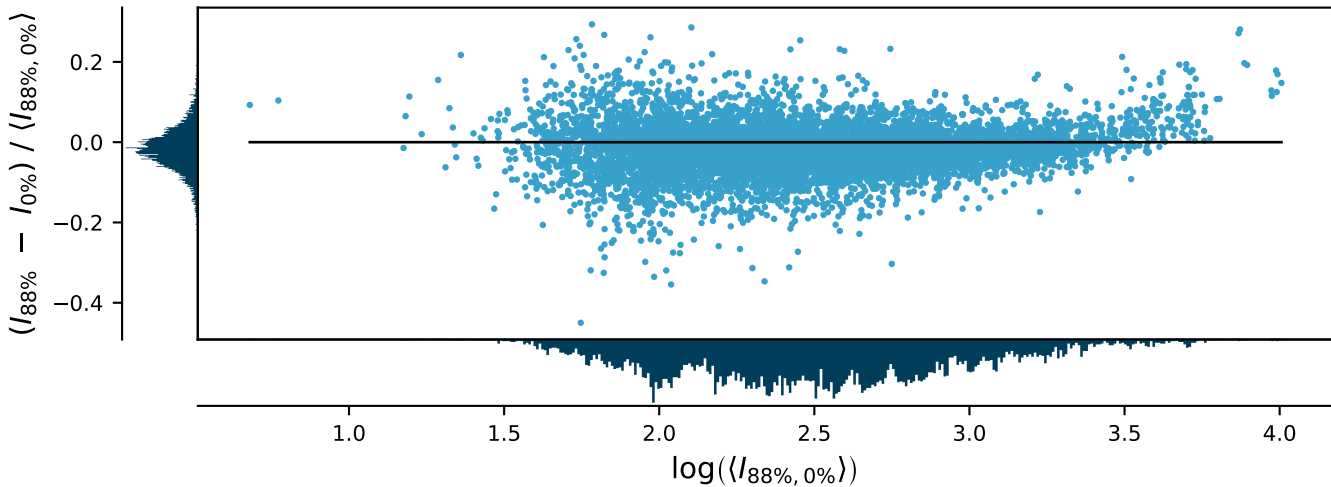

Plot of 88% against 35% attenuation at an exposure time of 0.5 seconds

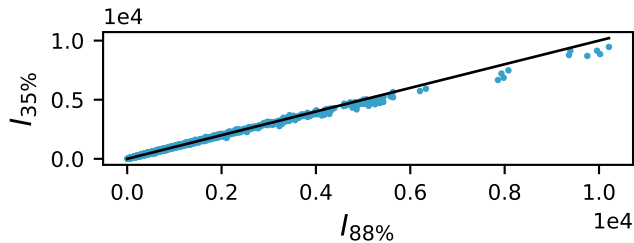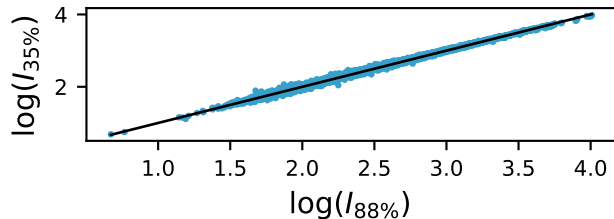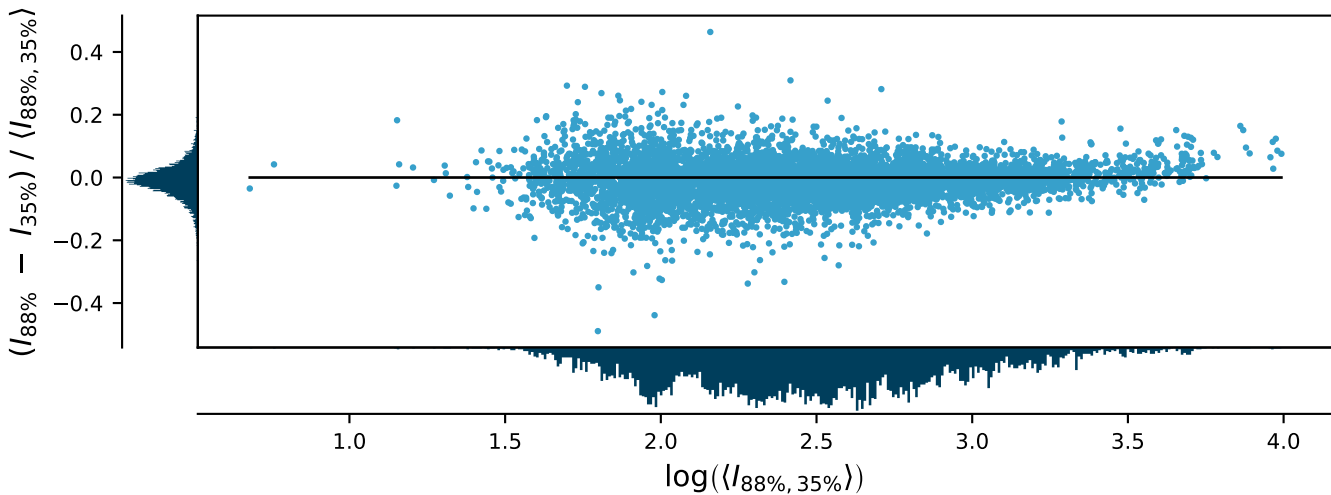

Plot of 88% against 69% attenuation at an exposure time of 0.5 seconds

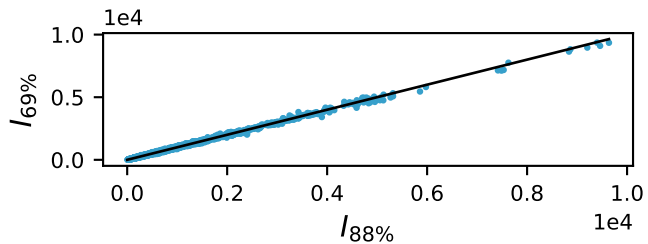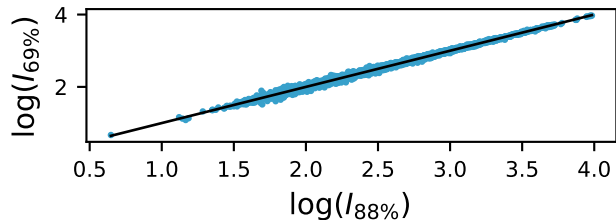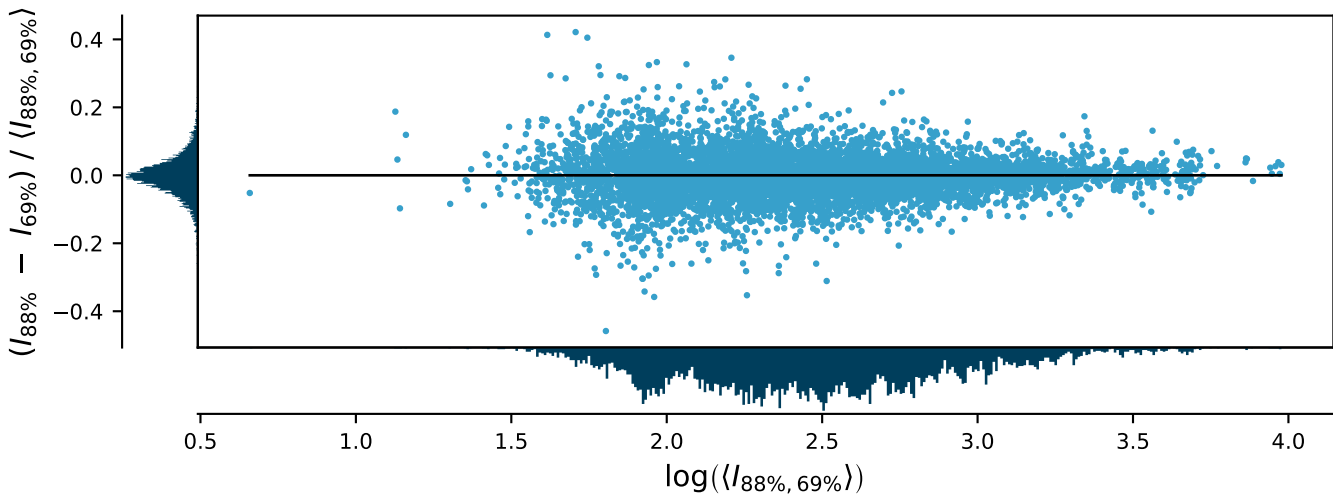

Plot of 35% against 0% attenuation at an exposure time of 1.0 seconds

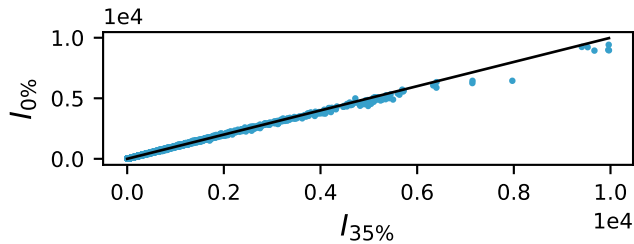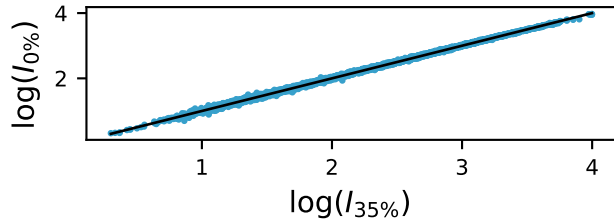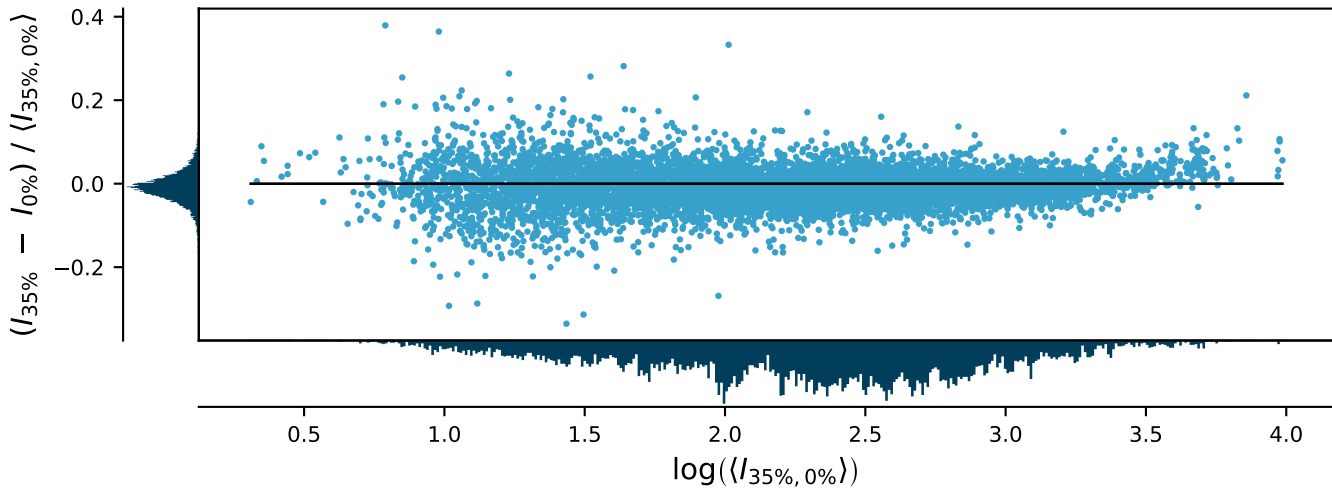

Plot of 69% against 0% attenuation at an exposure time of 1.0 seconds

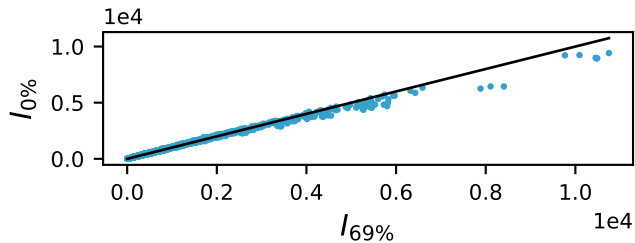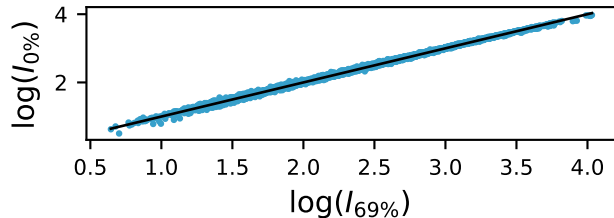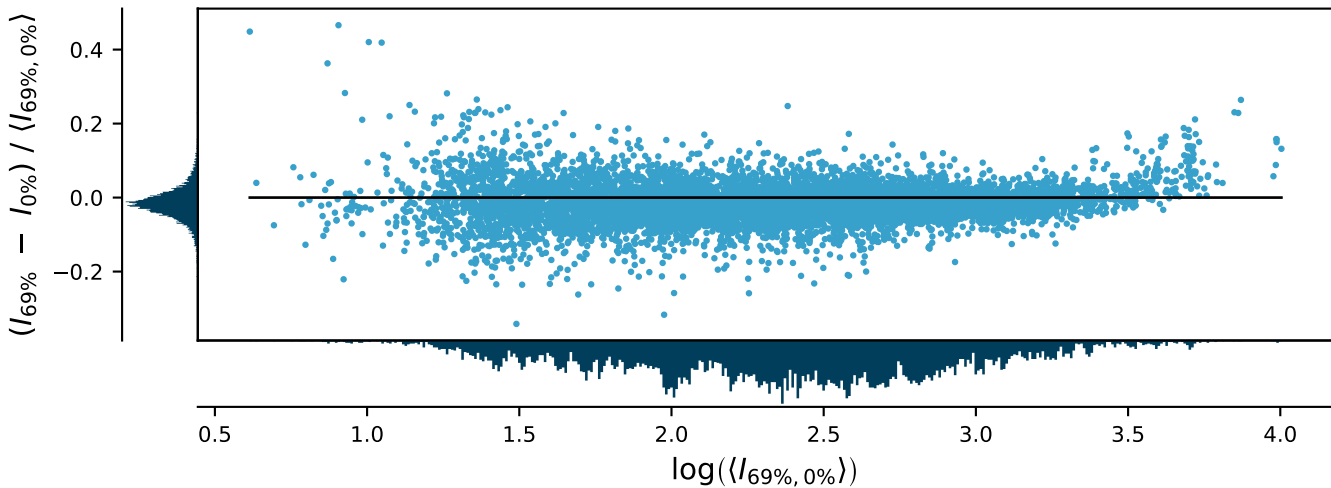

Plot of 69% against 35% attenuation at an exposure time of 1.0 seconds

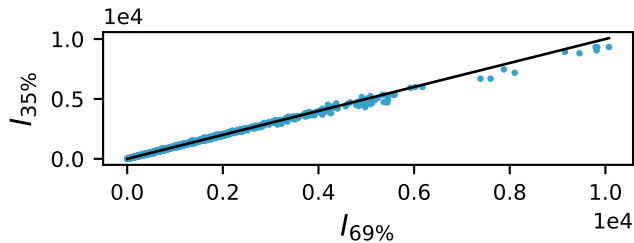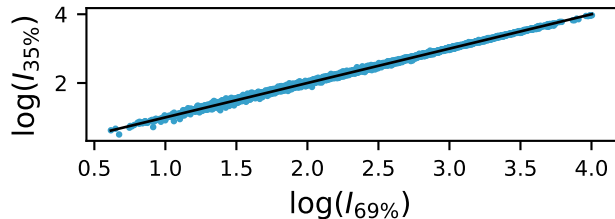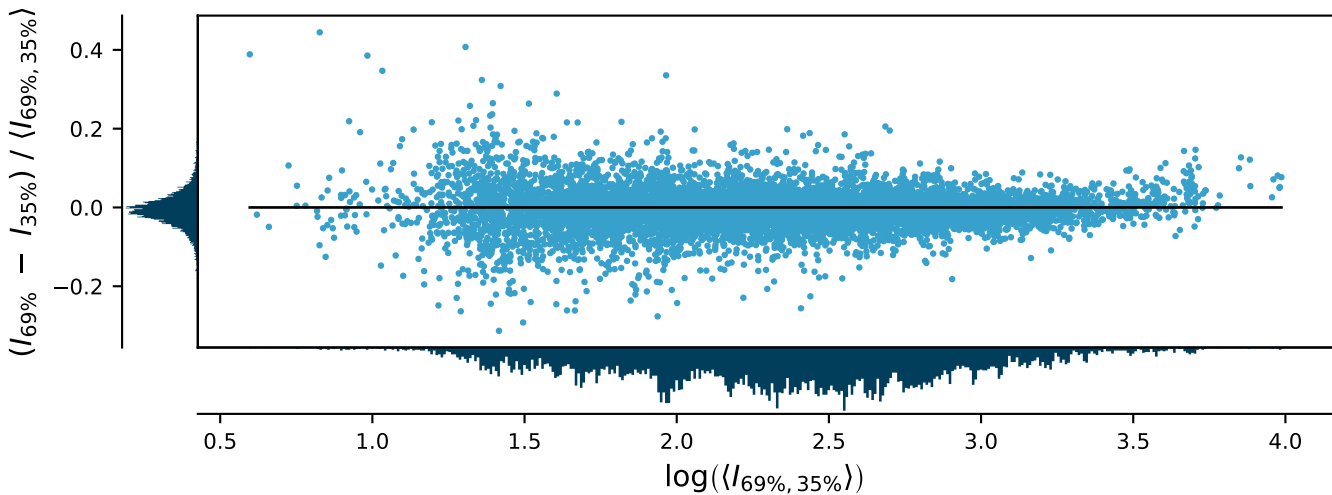

Plot of 88% against 0% attenuation at an exposure time of 1.0 seconds

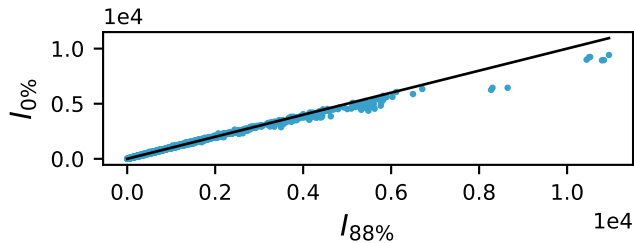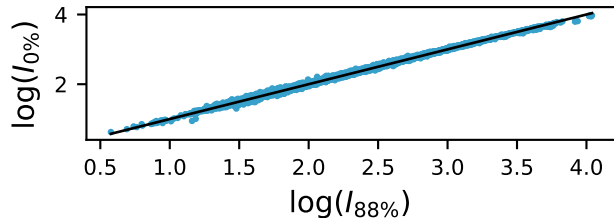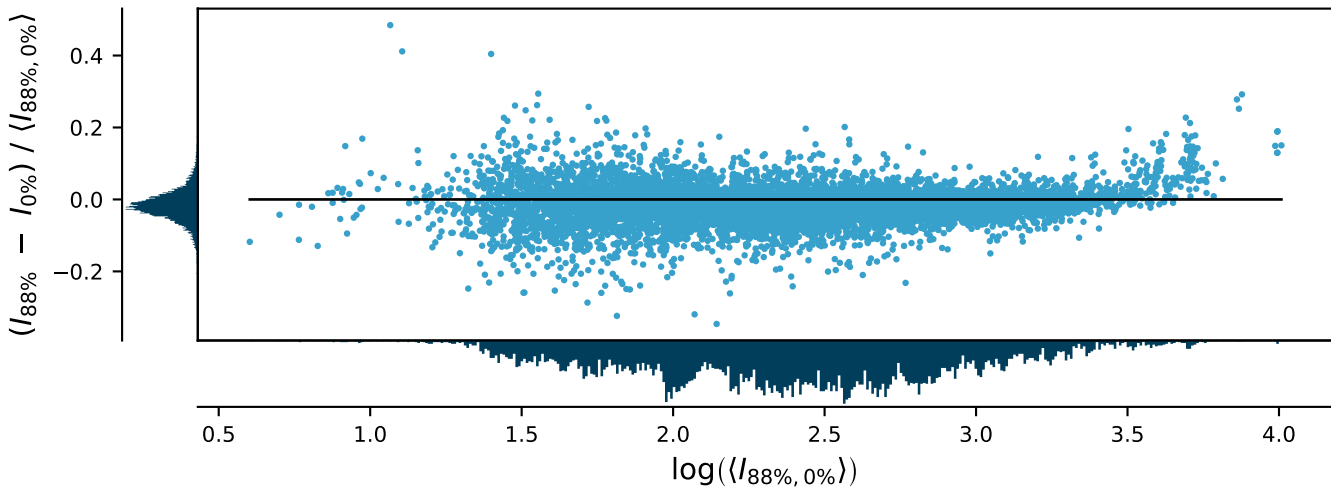



Plot of 88% against 35% attenuation at an exposure time of 1.0 seconds

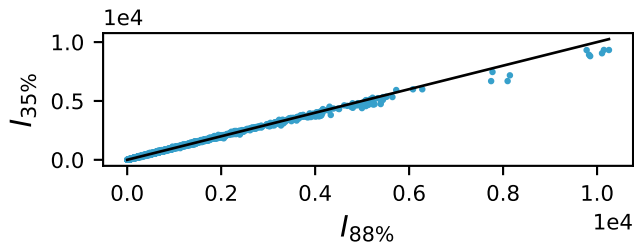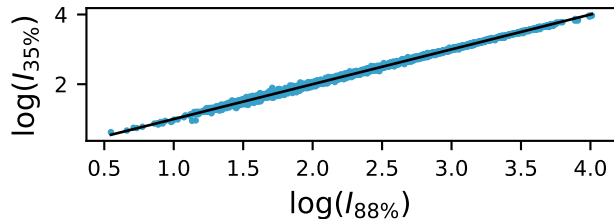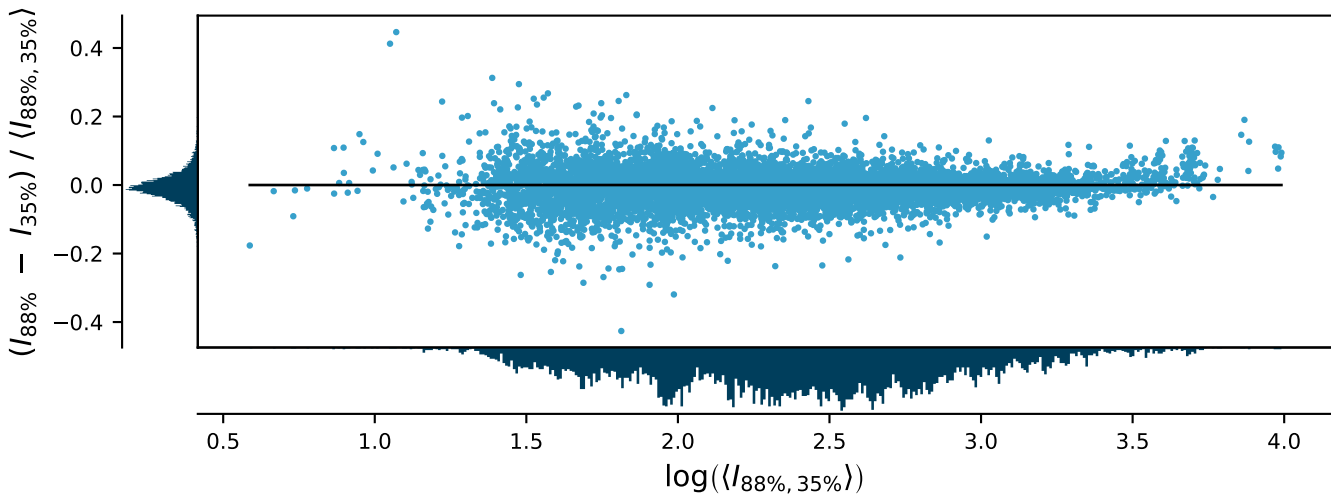

Plot of 88% against 69% attenuation at an exposure time of 1.0 seconds

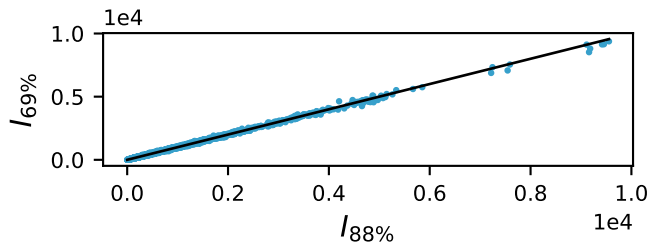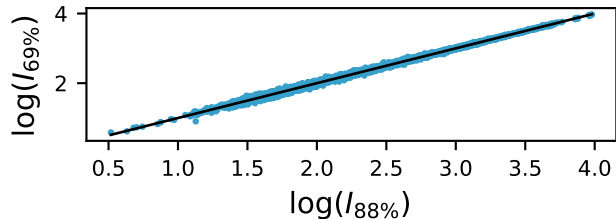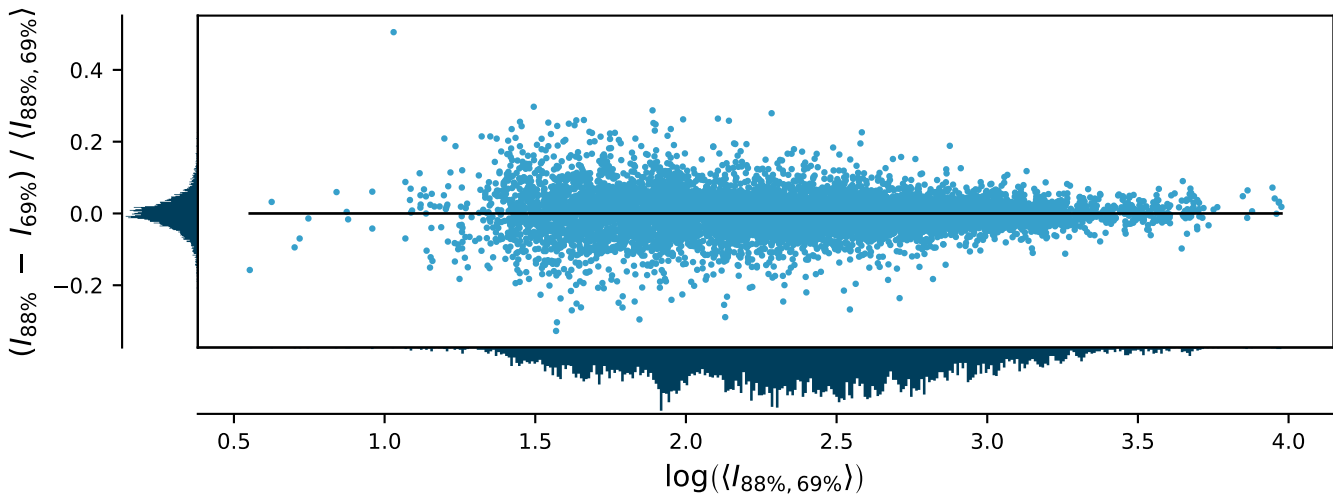

Plot of 69% against 35% attenuation at an exposure time of 2.0 seconds

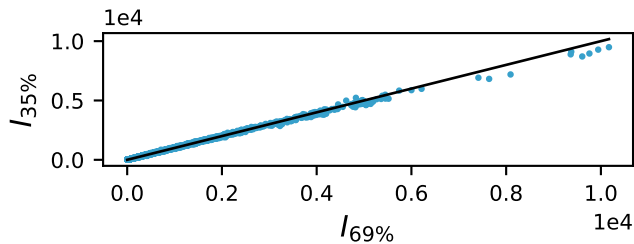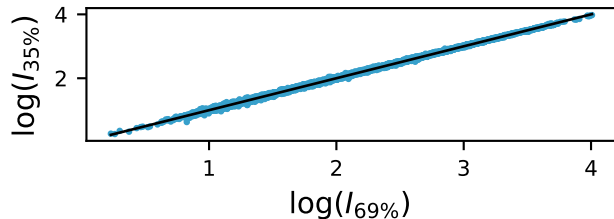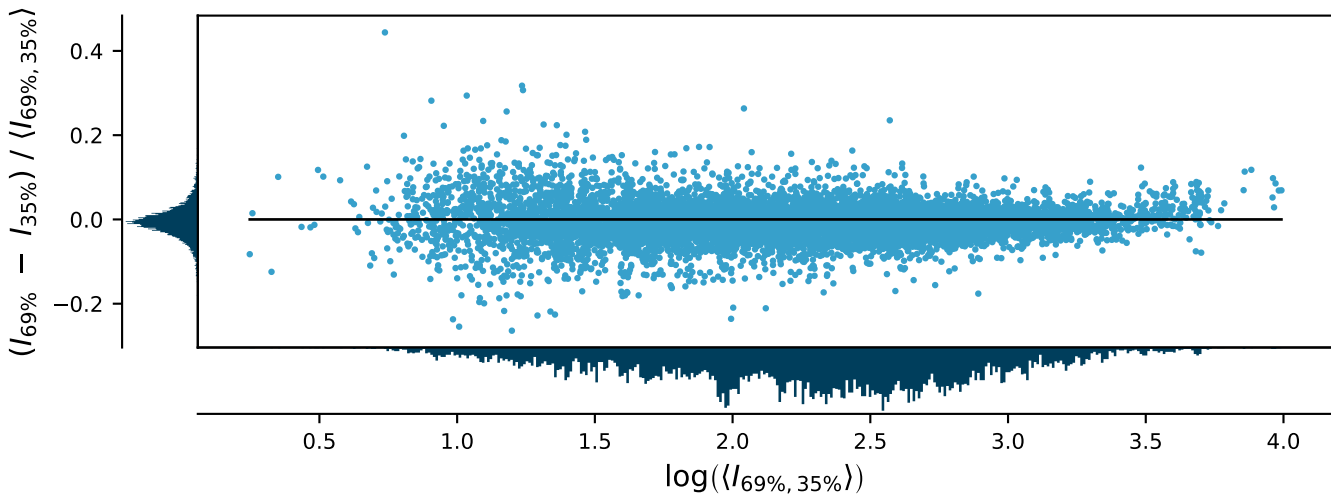

Plot of 88% against 35% attenuation at an exposure time of 2.0 seconds

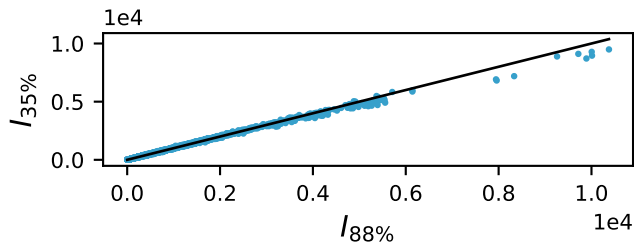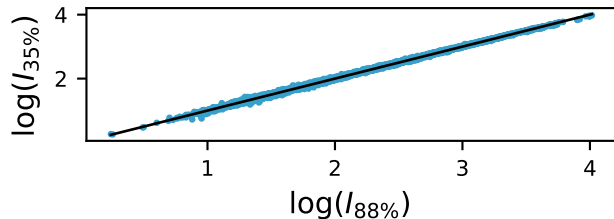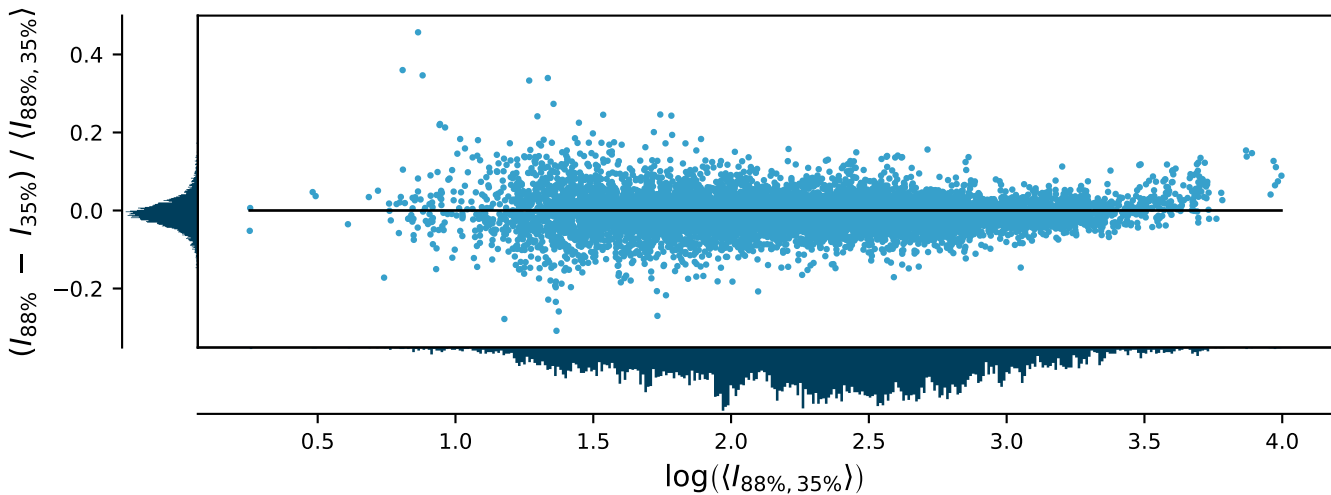

Plot of 88% against 69% attenuation at an exposure time of 2.0 seconds

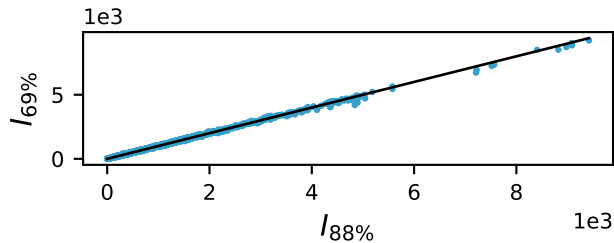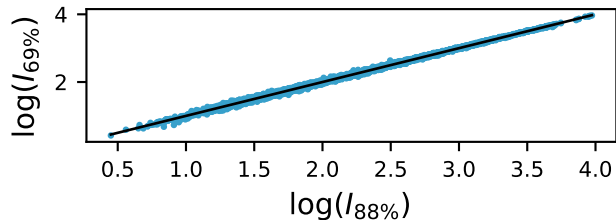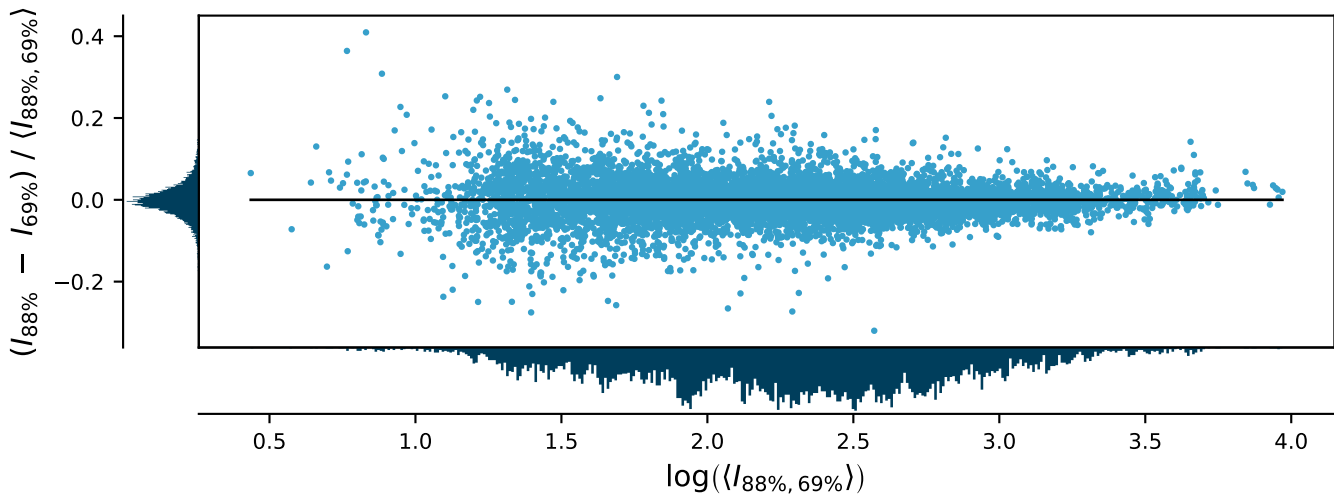

Supplement: j-53-00635-sup5.pdf [file j-53-00635-sup5.pdf]
