# Supplementary material
Source: PubMed Central journal article supplement (PMC7312157)
Supplement: j-53-00635-sup3.pdf [file j-53-00635-sup3.pdf]

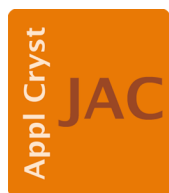

JOURNAL OF  
APPLIED  
CRYSTALLOGRAPHY

**Volume 53 (2020)**

**Supporting information for article:**

**Accurate high-resolution single-crystal diffraction data from a Pilatus3 X CdTe detector**

**Lennard Krause, Kasper Tolborg, Thomas Bjørn Egede Grønbech, Kuniyisa Sugimoto, Bo Brummerstedt Iversen and Jacob Overgaard**

**S1. FeSb2 Att vs Exp (ddm) at fixed attenuation**

See attached pdf file kc5106sup4.pdf

**S2. FeSb2 Att vs Att (ddm) at fixed exposure time**

See attached pdf file kc5106sup5.pdf

**S3. Detector pixel-by-pixel comparison**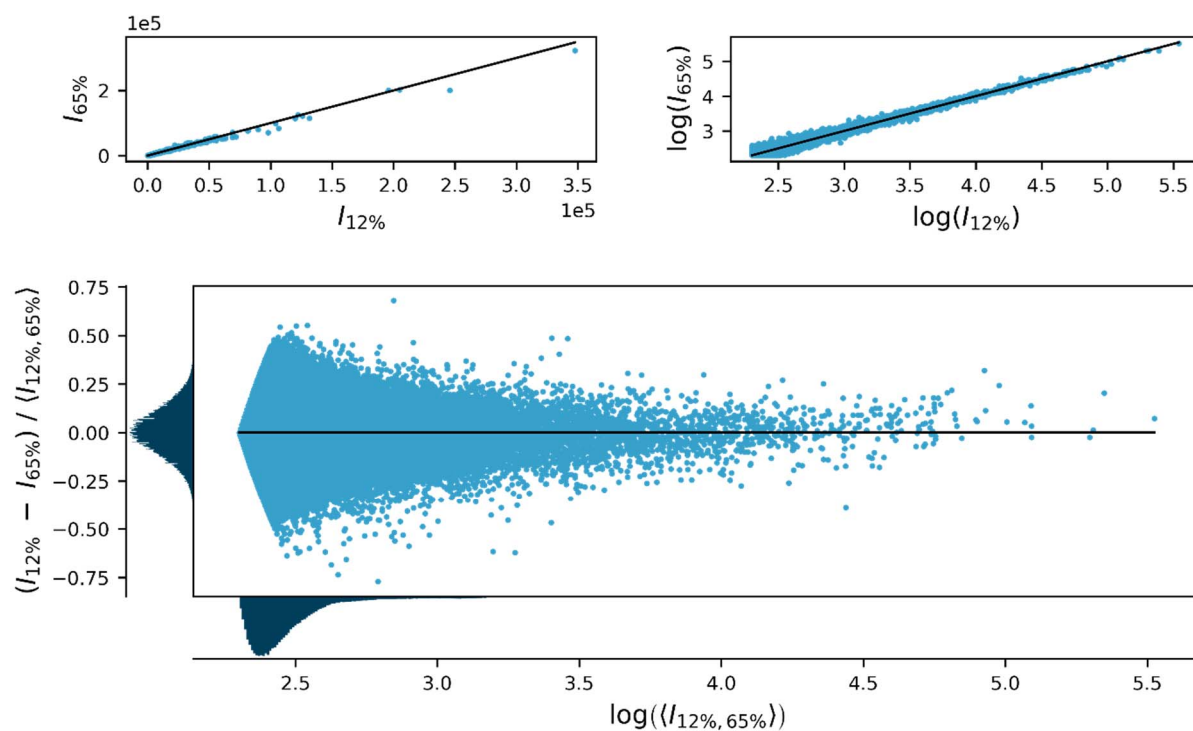

**Figure S1** Pixel-by-pixel comparison of the combined frames of the first run (360 images) of the data collected with 12% and 65% of the maximum beam flux. The data was scaled (scale factor of 4.274) and a low intensity cutoff was applied at 200 counts.

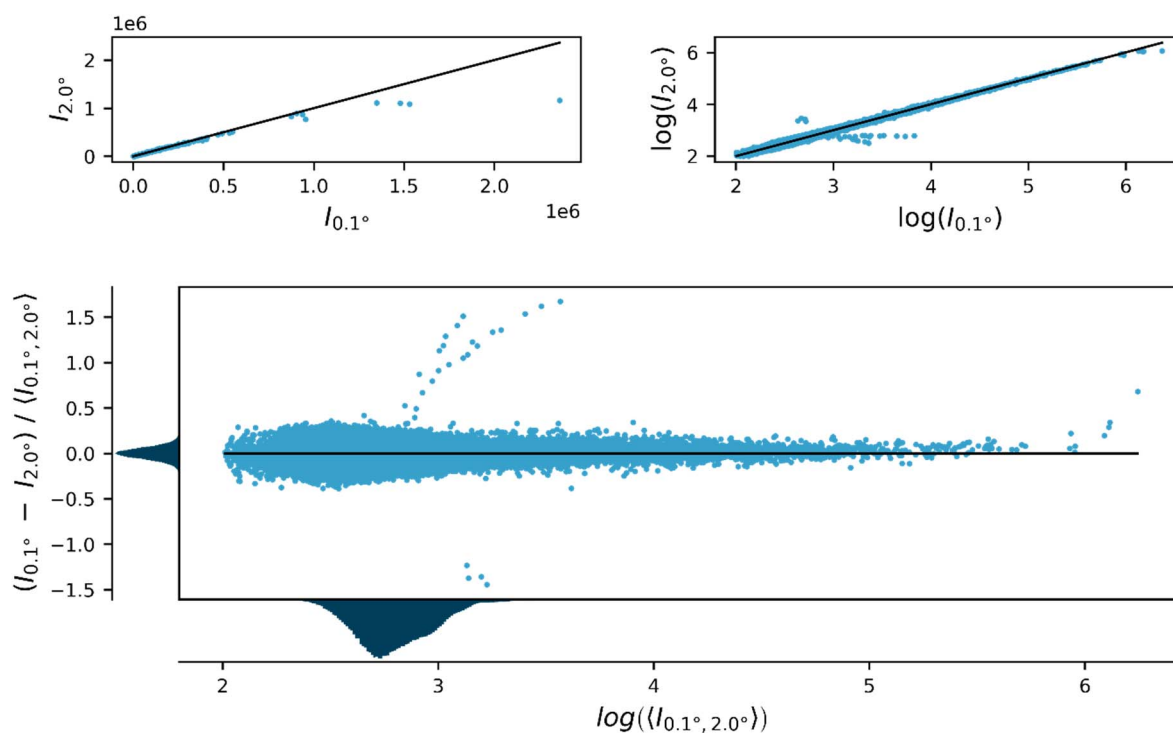

**Figure S2** Plot showing the unprocessed pixel-by-pixel comparison of frames acquired from different slicing experiments and hereby a direct, unprocessed pixel-by-pixel comparison. The individual frames of two slicing experiments ( $0.1^\circ$ , 900 images;  $2.0^\circ$ , 45 images) are combined to give two images with the same accumulated exposure time and scan width. The plot shows the same trend for the strong data and no indication of any other bias.

**S4. Effect of beam flux, extinction and exposure time on the electron density model**

| Beam flux [%] <sup>#</sup> | Exposure [s] | GoF    | Data | Extinction | R( $F^2$ ) | $\epsilon_{\text{gross}}$ |
|----------------------------|--------------|--------|------|------------|------------|---------------------------|
| 12                         | 0.2          | 0.9069 | 2469 | 11.5       | 0.0232     | 28.2598                   |
| 12                         | 0.2          | 0.9419 | 2469 | None       | 0.0272     | 30.4041                   |
| 12                         | 0.5          | 0.9577 | 2491 | 7.8        | 0.0181     | 21.6559                   |
| 12                         | 0.5          | 0.9747 | 2491 | None       | 0.0206     | 23.4621                   |
| 12                         | 1.0          | 0.9657 | 2497 | 8.1        | 0.0151     | 16.6616                   |
| 12                         | 1.0          | 0.9896 | 2497 | None       | 0.0176     | 18.5596                   |
| 12                         | 2.0          | 0.9911 | 2502 | 7.6        | 0.0151     | 16.0055                   |
| 12                         | 2.0          | 1.0087 | 2502 | None       | 0.0176     | 18.1266                   |
| 12                         | 4.0          | 1.0062 | 2504 | 8.8        | 0.0148     | 15.0408                   |
| 12                         | 4.0          | 1.0317 | 2504 | None       | 0.0171     | 18.1257                   |
| 31                         | 0.2          | 0.9305 | 2476 | 13.1       | 0.0206     | 24.3815                   |
| 31                         | 0.2          | 0.9839 | 2476 | None       | 0.0256     | 27.1                      |
| 31                         | 0.5          | 0.9239 | 2503 | 11.6       | 0.0167     | 18.2965                   |
| 31                         | 0.5          | 0.9660 | 2503 | None       | 0.0209     | 22.1119                   |
| 31                         | 1.0          | 0.9592 | 2493 | 10.3       | 0.0153     | 16.0508                   |
| 31                         | 1.0          | 0.9940 | 2493 | None       | 0.0187     | 19.9466                   |
| 31                         | 2.0          | 0.9962 | 2504 | 12         | 0.0145     | 15.1029                   |
| 31                         | 2.0          | 1.0445 | 2504 | None       | 0.0192     | 20.1886                   |
| 31                         | 4.0          | 1.0192 | 2510 | 10.8       | 0.014      | 14.626                    |
| 31                         | 4.0          | 1.0567 | 2510 | None       | 0.018      | 19.6108                   |
| 65                         | 0.2          | 0.9392 | 2499 | 21.7       | 0.0163     | 18.5911                   |
| 65                         | 0.2          | 1.1275 | 2499 | None       | 0.0267     | 28.4948                   |
| 65                         | 0.5          | 0.9783 | 2501 | 20.4       | 0.0148     | 15.714                    |
| 65                         | 0.5          | 1.1587 | 2501 | None       | 0.0247     | 26.5884                   |
| 65                         | 1.0          | 1.0003 | 2504 | 20.6       | 0.0145     | 15.0017                   |
| 65                         | 1.0          | 1.1684 | 2504 | None       | 0.0243     | 27.1425                   |
| 65                         | 2.0          | 1.0332 | 2508 | 21.7       | 0.0137     | 14.1569                   |
| 65                         | 2.0          | 1.2321 | 2508 | None       | 0.0246     | 26.4792                   |
| 100                        | 0.2          | 0.9621 | 2502 | 26.3       | 0.0144     | 15.9226                   |
| 100                        | 0.2          | 1.3000 | 2502 | None       | 0.0288     | 30.6525                   |
| 100                        | 0.5          | 1.0041 | 2509 | 28.9       | 0.0126     | 13.4989                   |
| 100                        | 0.5          | 1.4388 | 2509 | None       | 0.0304     | 32.0323                   |
| 100                        | 1.0          | 1.0304 | 2506 | 30.7       | 0.0132     | 14.1031                   |
| 100                        | 1.0          | 1.5559 | 2506 | None       | 0.0315     | 36.8259                   |

<sup>#</sup>: In percent of the maximum beam flux.

**S5. Effect of attenuation on the intensities**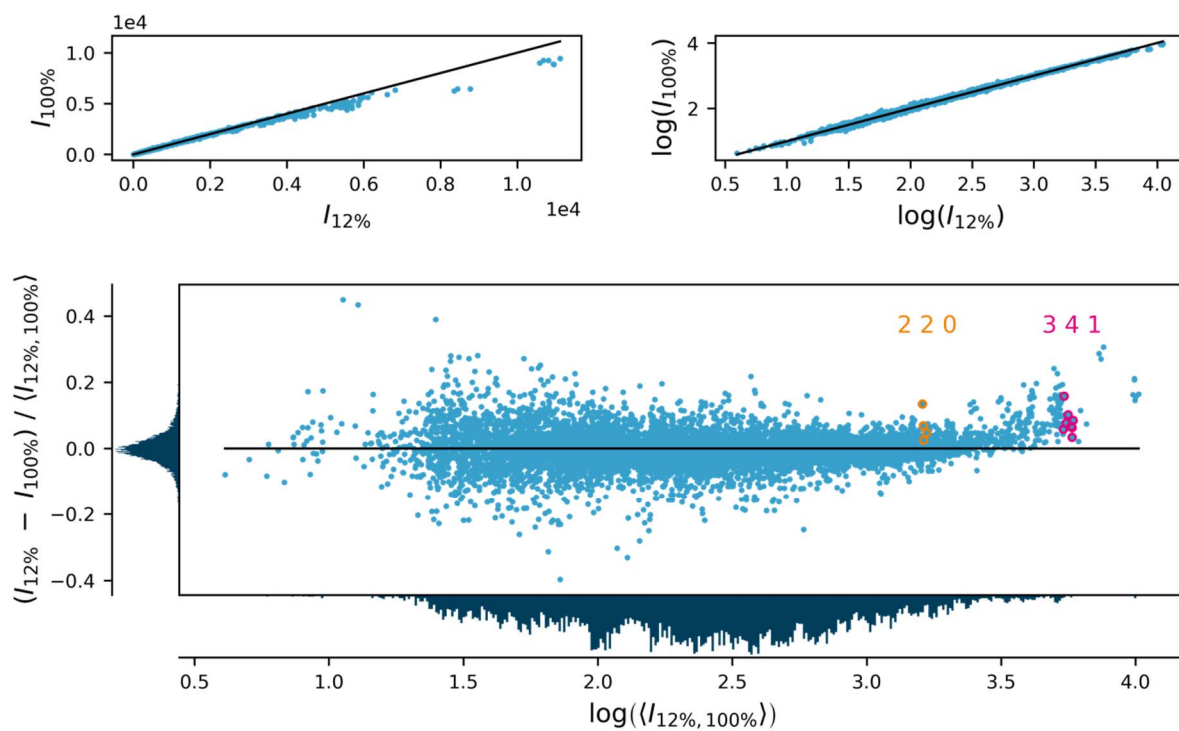

**Figure S3** Comparison of integrated, scaled and averaged diffraction intensities of FeSb<sub>2</sub> collected with 12 % and 100 % of the full beam intensity with the reflections 3 4 1 and 2 2 0 (plus their equivalents) highlighted.

**S6. SAINT: Spot profile fitting**

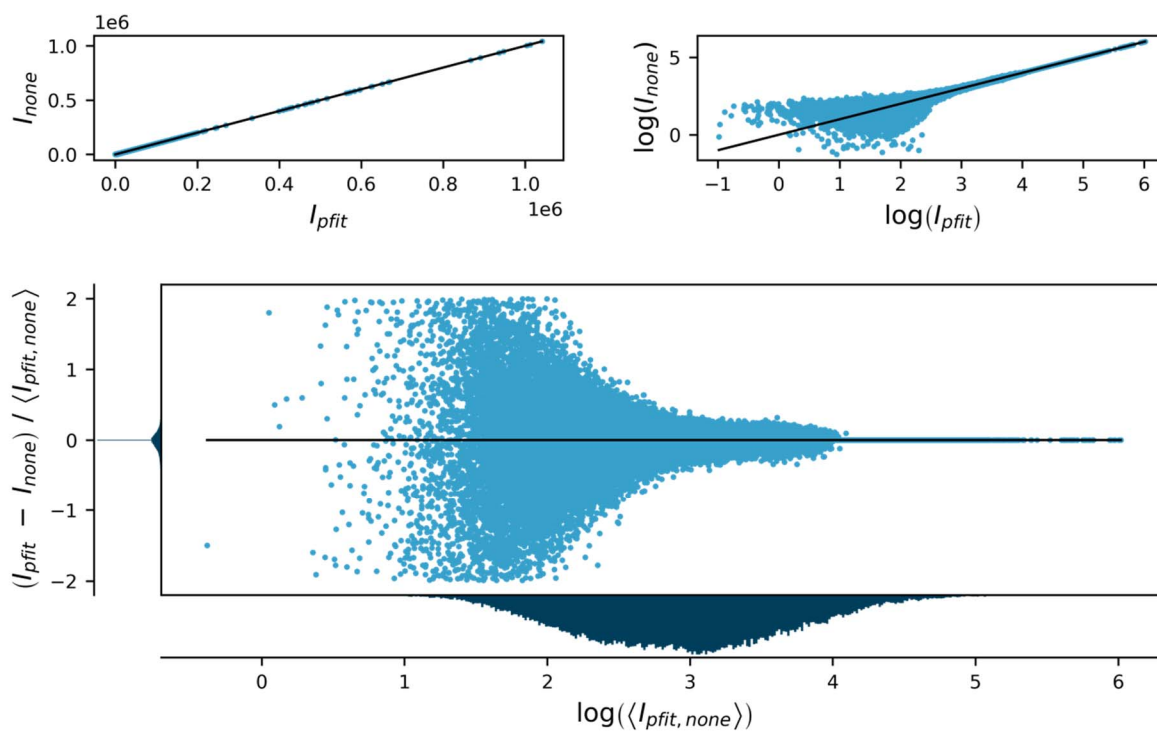

**Figure S4** Supplement for Figure 7, intensity comparison of data integrated using LS-fitting (pfit) and without (none), without an  $I/\sigma$  cutoff.

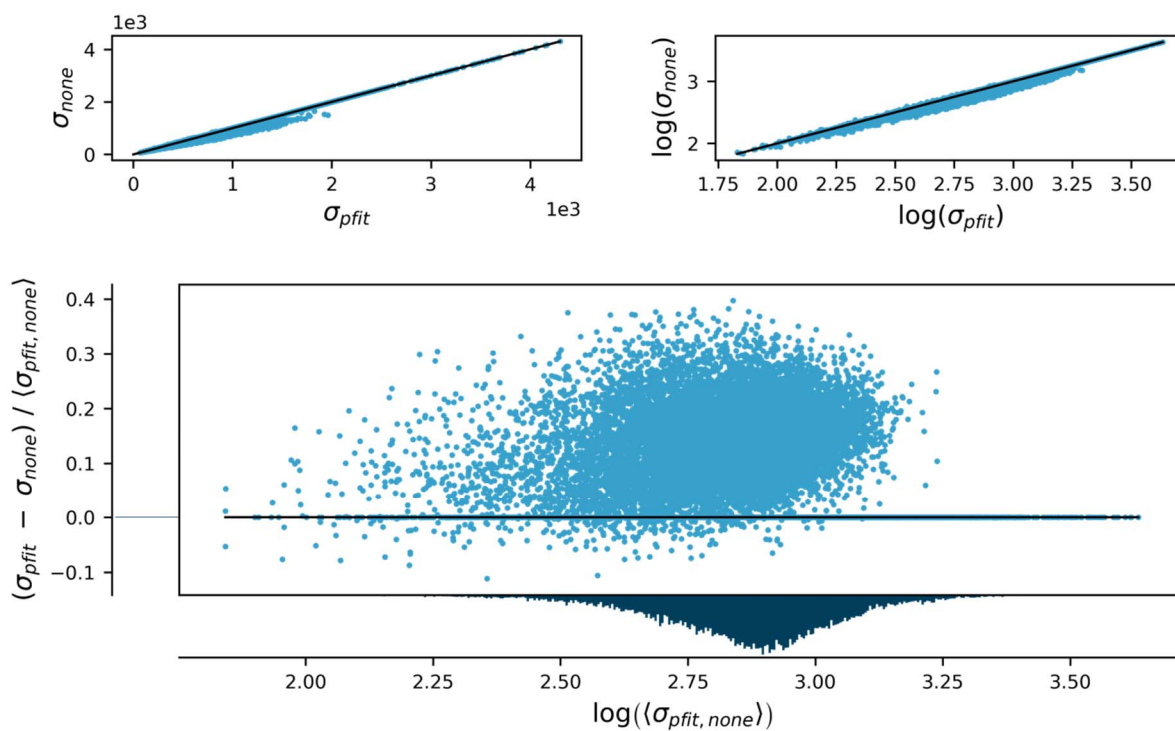

**Figure S5** Comparison similar to Figure 7, however, with an  $I/\sigma$  cutoff of 3.0 applied.

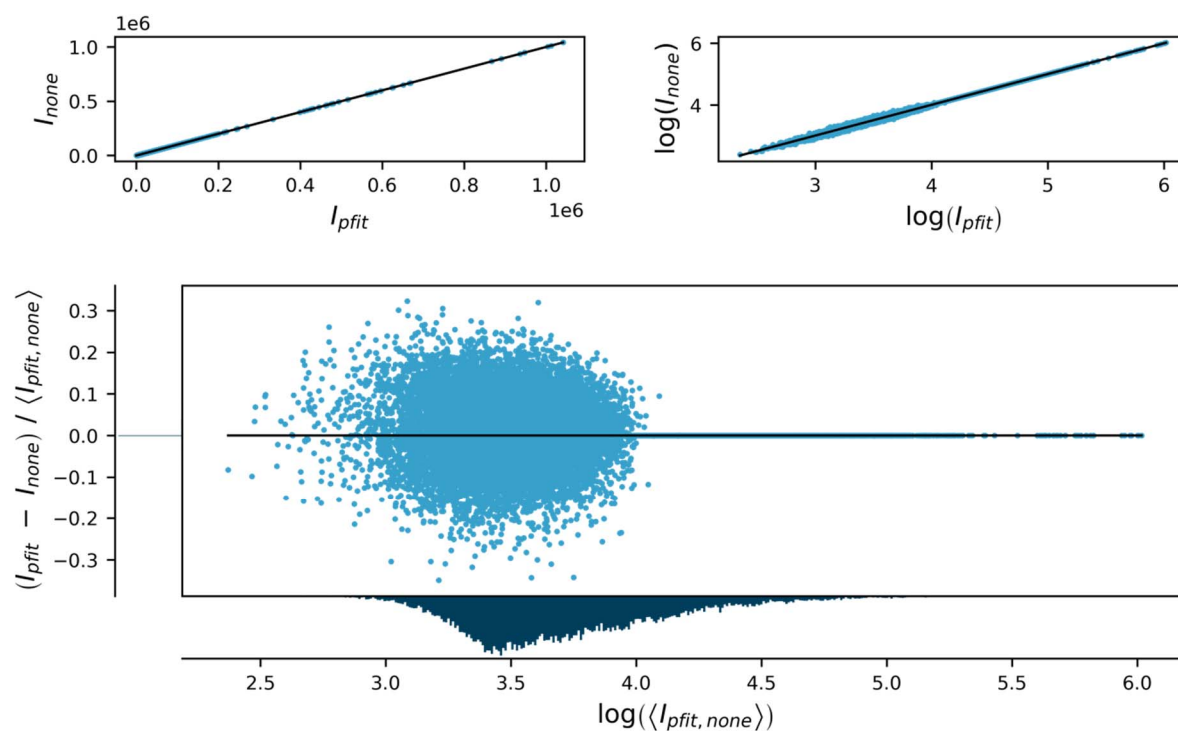

**Figure S6** Comparison similar to Figure S4, however, with an  $I/\sigma$  cutoff of 3.0 applied.

**S7. SAINT: Best-plane background and recurrence method**

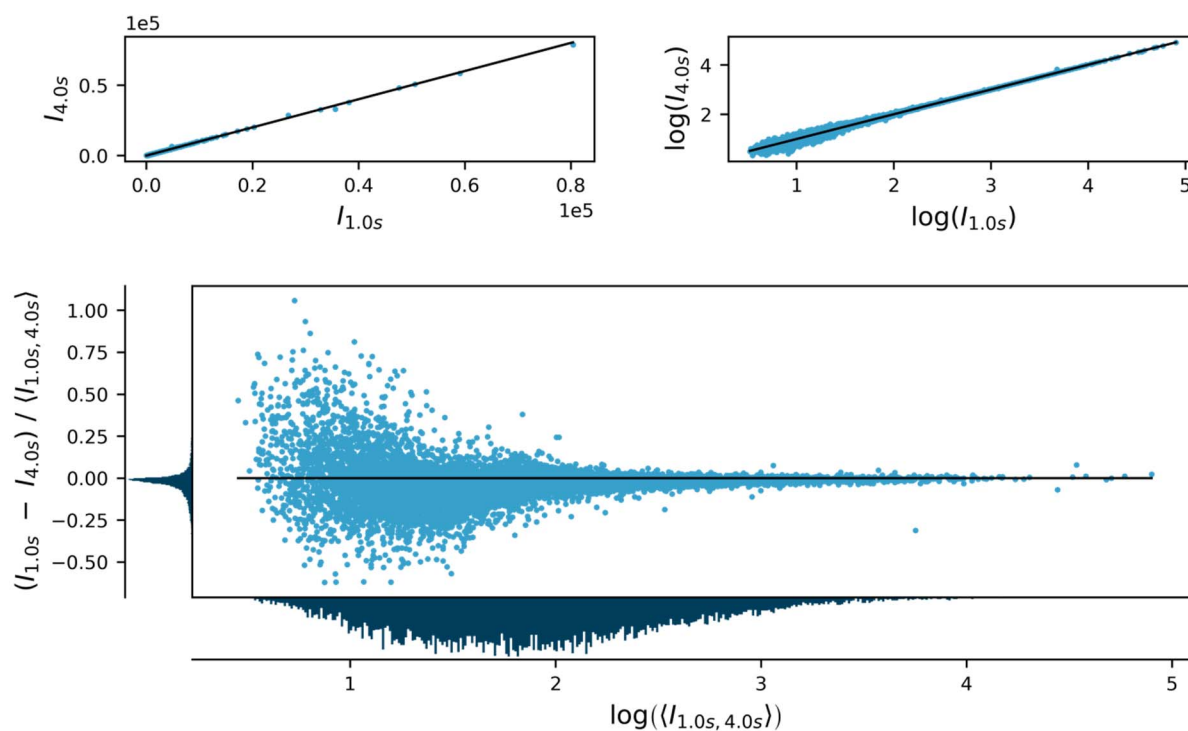

**Figure S7** Best-plane background estimation compared for two exposure times (1.0 s and 4.0 s)

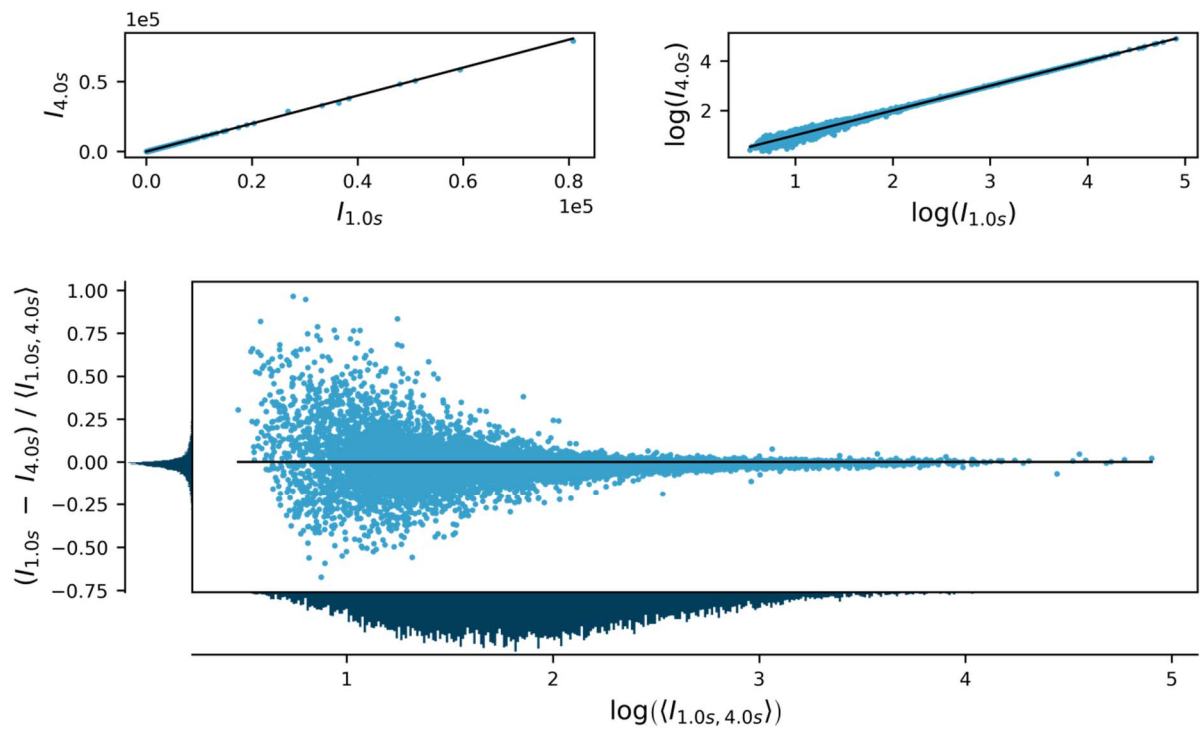

**Figure S8** Recurrence background estimation compared for two exposure times (1.0 s and 4.0 s)



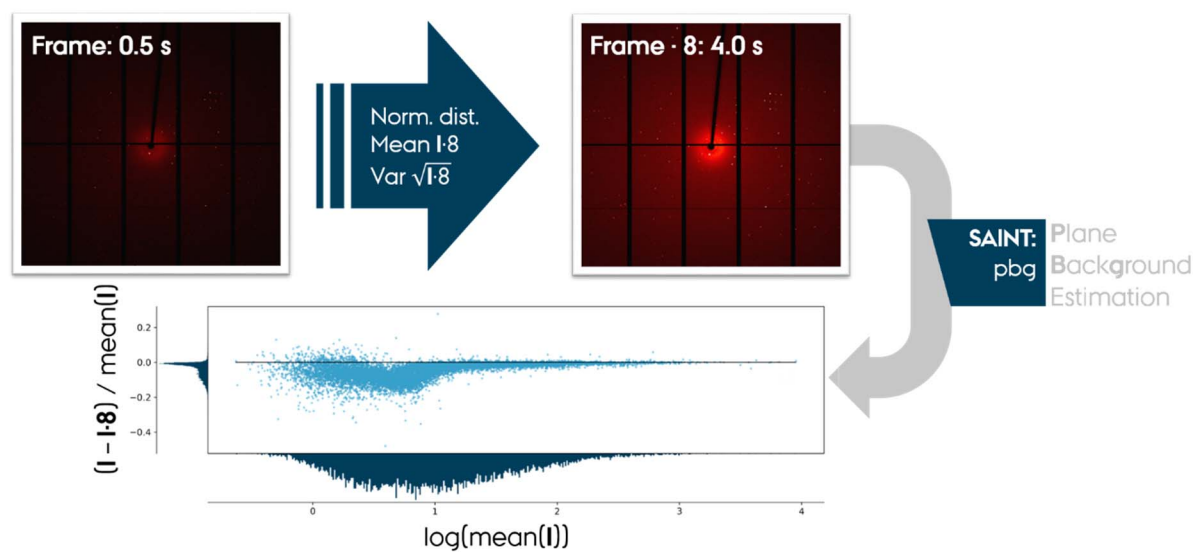

**Figure S9** To exclude systematics in the data being responsible for the differences we constructed artificial data to simulate a perfect photon-counting detector, a program was written to manipulate images accordingly. The algorithm generates new images pixel by pixel, calculating a new pixel value  $c_i$  using a normal distribution around the value  $c_i * m$  and a spread  $\text{sqrt}(c_i * m)$  assuming Poisson noise. Two images were generated, one with the original intensities (but now more noisy) and a second with manipulated intensities, that were to be compared. The rationale behind the addition of Poisson noise was that a simple pixel-by-pixel multiplication resulted in ragged images with unphysical intensity distributions in the low-count areas, significantly affecting the background estimation of the integration routine.

**S8. SADABS/SORTAV comparison: Exposure times**

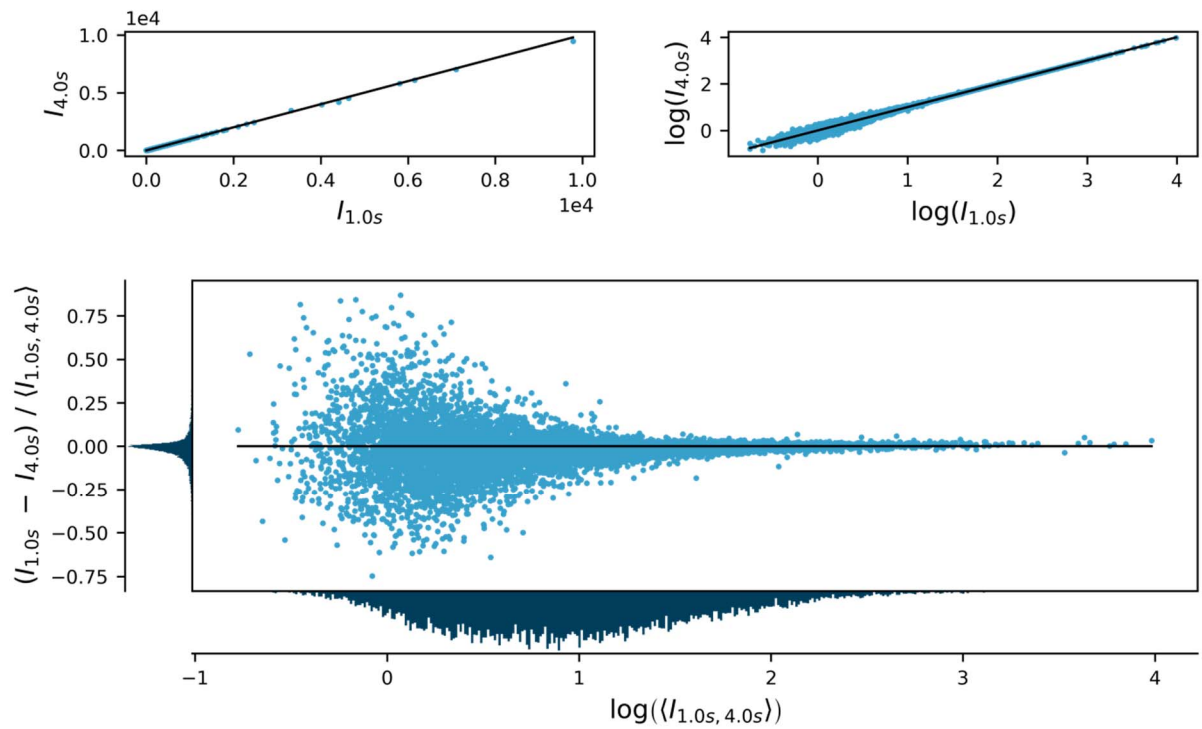

**Figure S10** SADABS averaged equivalents compared for two exposure times (1.0 s and 4.0 s)

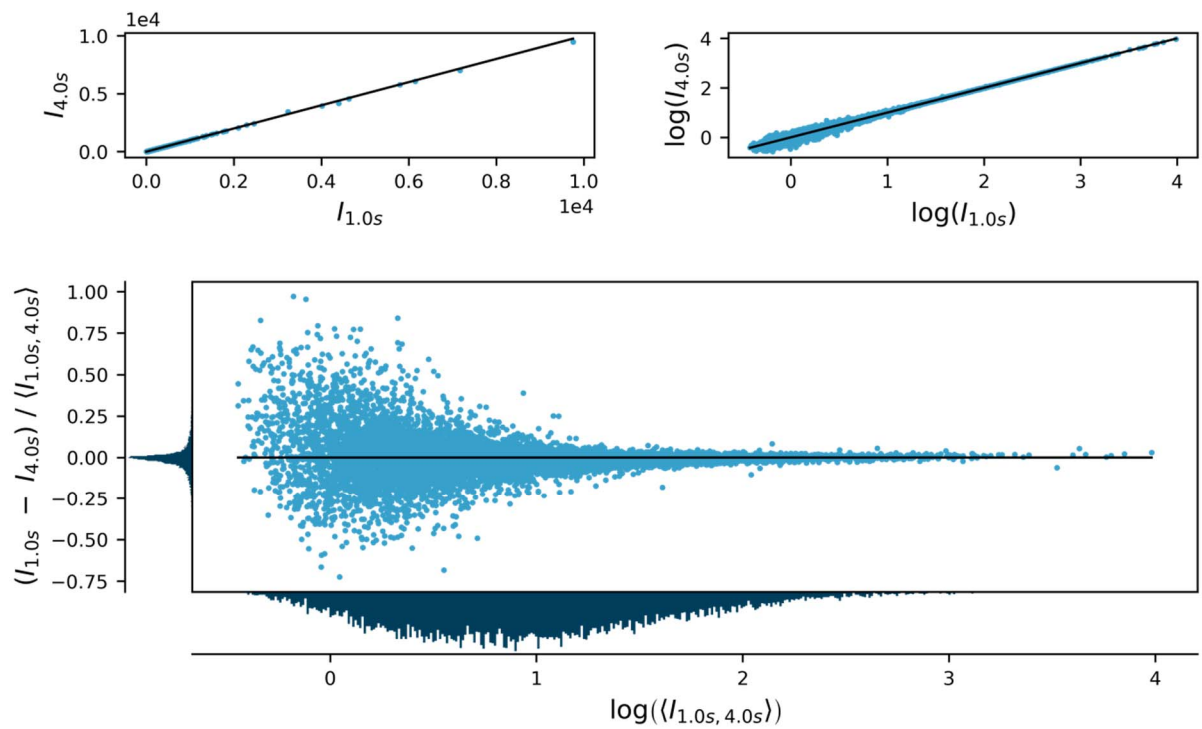

**Figure S11** SORTAV averaged equivalents compared for two exposure times (1.0 s and 4.0 s)

**S9. Skewness of the distribution of equivalent reflections**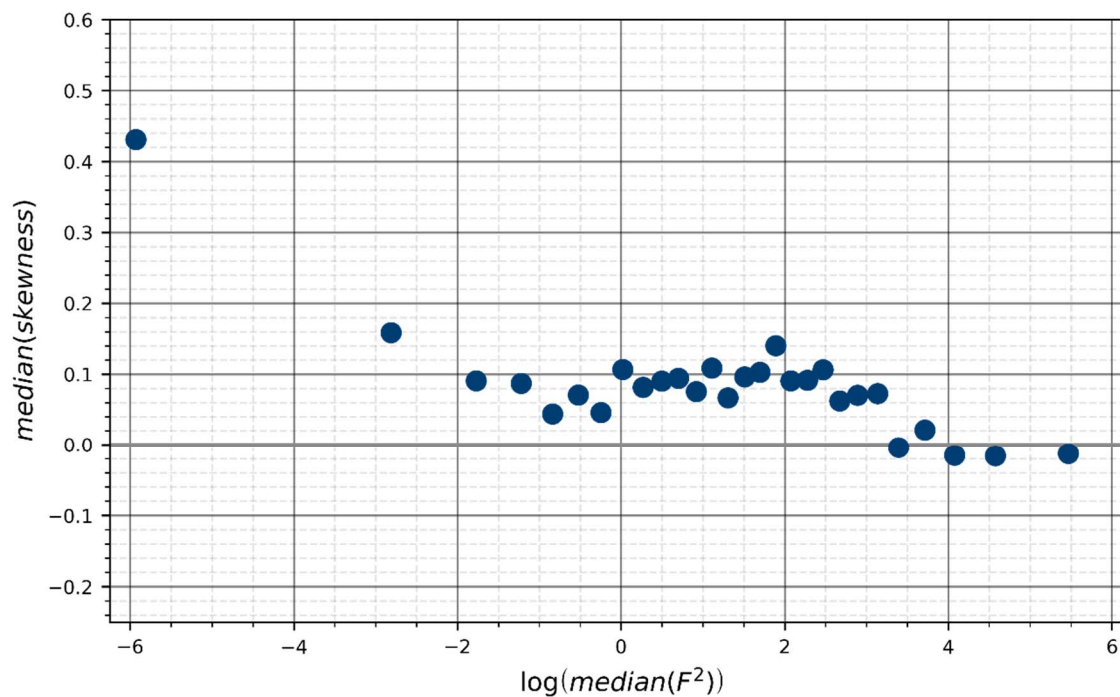

**Figure S12** Skewness of the distribution of equivalent reflections versus the median intensity for unmerged data (binned) collected with an exposure time of 0.5 s.

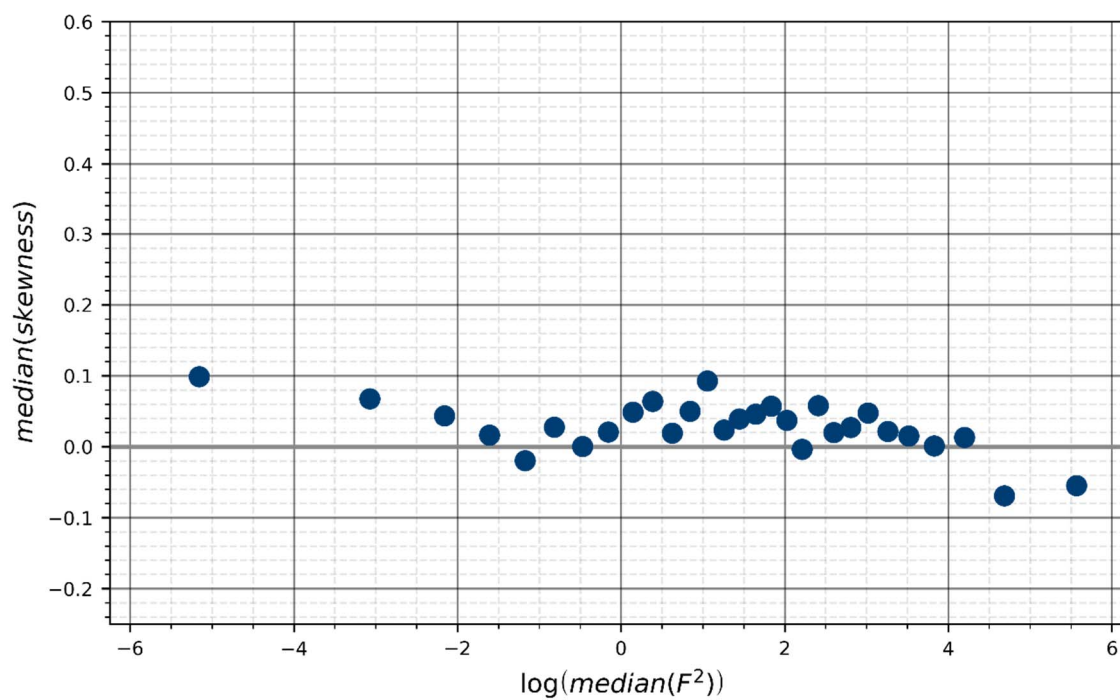

**Figure S13** Skewness of the distribution of equivalent reflections versus the median intensity for unmerged data (binned) collected with an exposure time of 4.0 s.

### S10. Systematic bias for weak data in data averaging

Artificial data was generated from a structure-factor file (*fco*) in combination with its unprocessed intensity file (*raw*, obtained directly from the integration software SAINT). The intensities in the *fco* were used as the expectation values to generate new intensities  $I_{hkl,i}$  (integers, number of photons) following a random Poisson distribution and the number of generated values (*i*) matched the multiplicity of equivalent reflections in the *raw* file. The error  $\sigma(I_{hkl,i})$  of the new intensities was chosen to reflect only Poisson noise ( $\sqrt{I}$ ) with a lower boundary of 1. The calculated artificial  $I_{hkl,i}$  and  $\sigma(I_{hkl,i})$  were then used to replace the values in the *raw* file. This artificial *raw* file was processed using SADABS producing an unmerged *hkl* file with a suppressed error model ( $K = 1.0$ ,  $g = 0.0$ ) and an averaged *hkl* file (using error model 5, the values obtained for  $K$  ranged from 0.997 to 1.008 and  $g$  refined to 0.0028). The unmerged *hkl* was subsequently averaged using SORTAV. The following two plots show the difference between the ideal data ( $I_{fco}$ ) and the averaged data ( $I_{sad}$ ,  $I_{sor}$ ). Deviations are only visible in the weak intensity region; however, systematic errors are only visible for the SADABS averaged data.

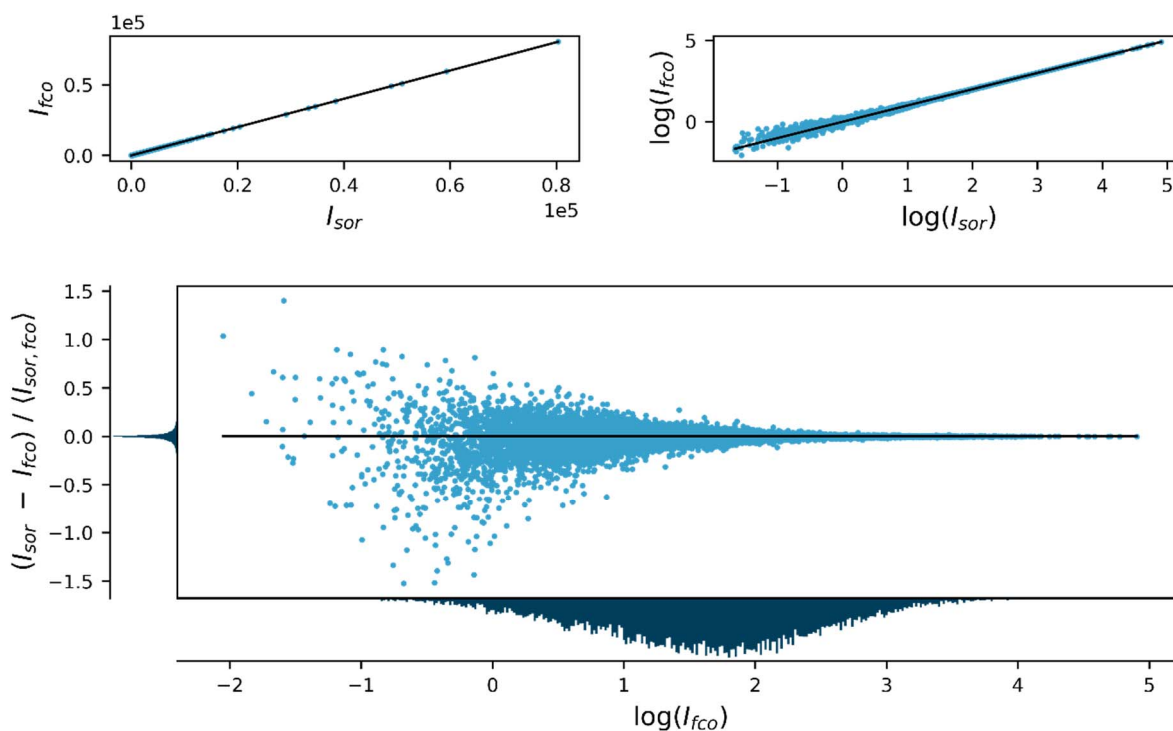

**Figure S14** Averaging performance of SORTAV, comparison of the averaged intensities ( $I_{sor}$ ) and the ideal data ( $I_{fco}$ ).

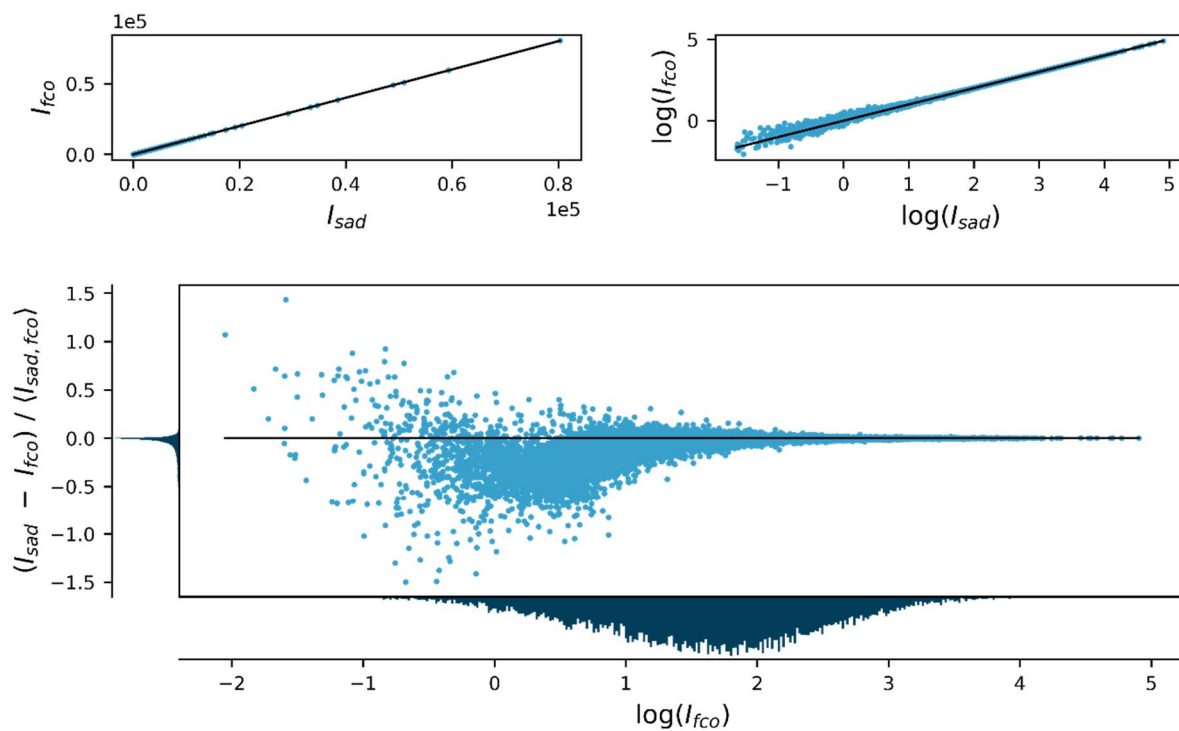

**Figure S15** Averaging performance of SADABS, comparison of the averaged intensities ( $I_{sad}$ ) and the ideal data ( $I_{fco}$ ).

**S11. SADABS/SORTAV comparison: Normal probability and scale factor plots for Rubrene**

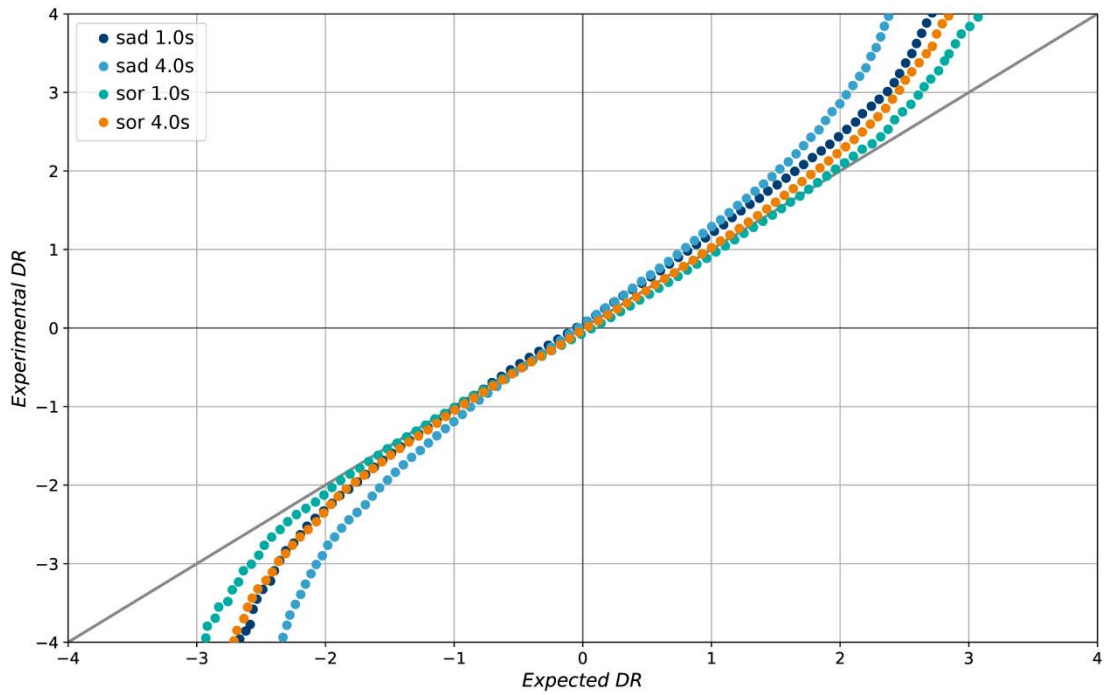

**Figure S16** Normal-probability plot for models derived from either SADABS (sad) or SORTAV (sor) and two exposure times (1.0s, 4.0s)

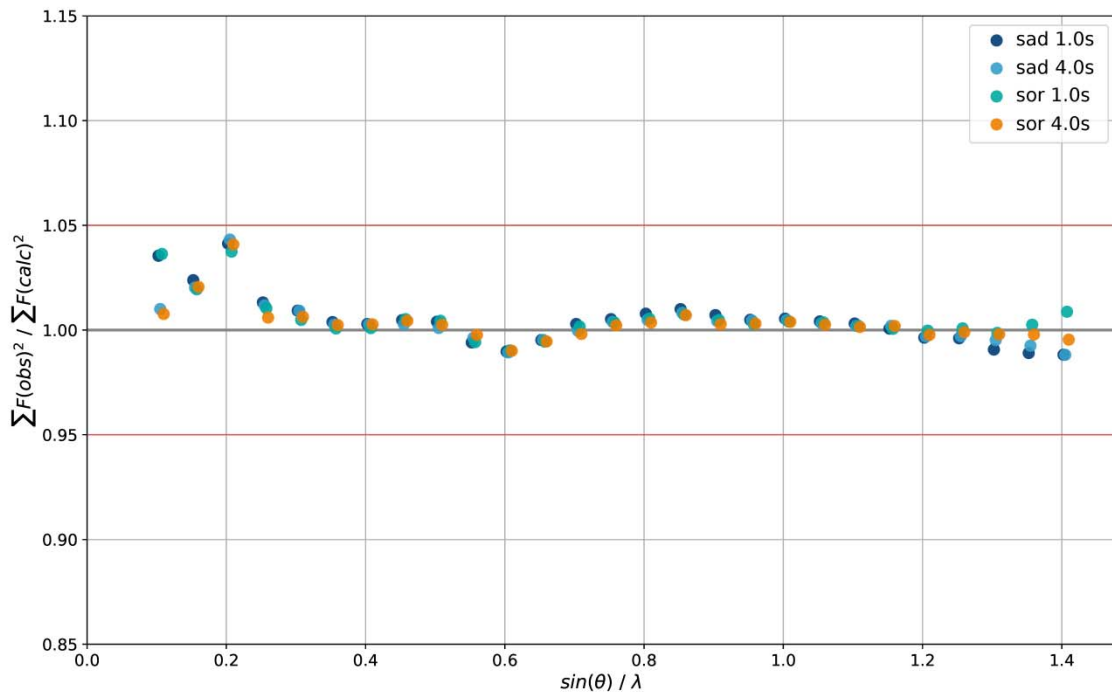

**Figure S17** Scale-factor plot for models derived from either SADABS (sad) or SORTAV (sor) and two exposure times (1.0s, 4.0s)

**S12. IP/P3 comparison: Rubrene**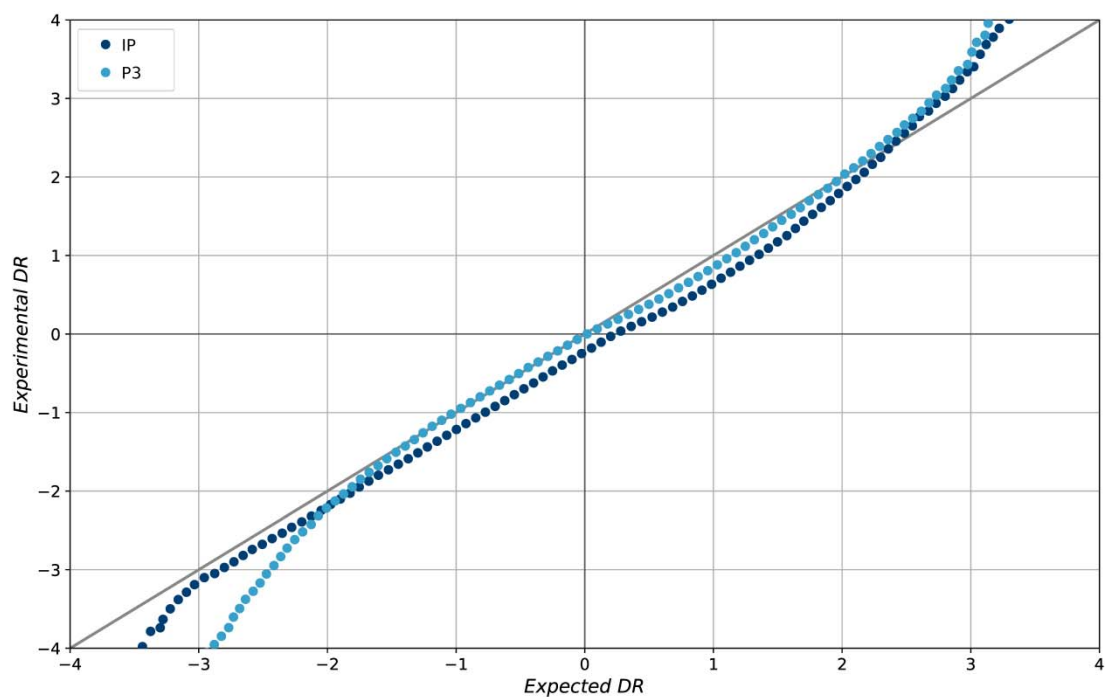**Figure S18** Normal-probability plot for models derived from image plate (IP) and Pilatus3 (P3) data.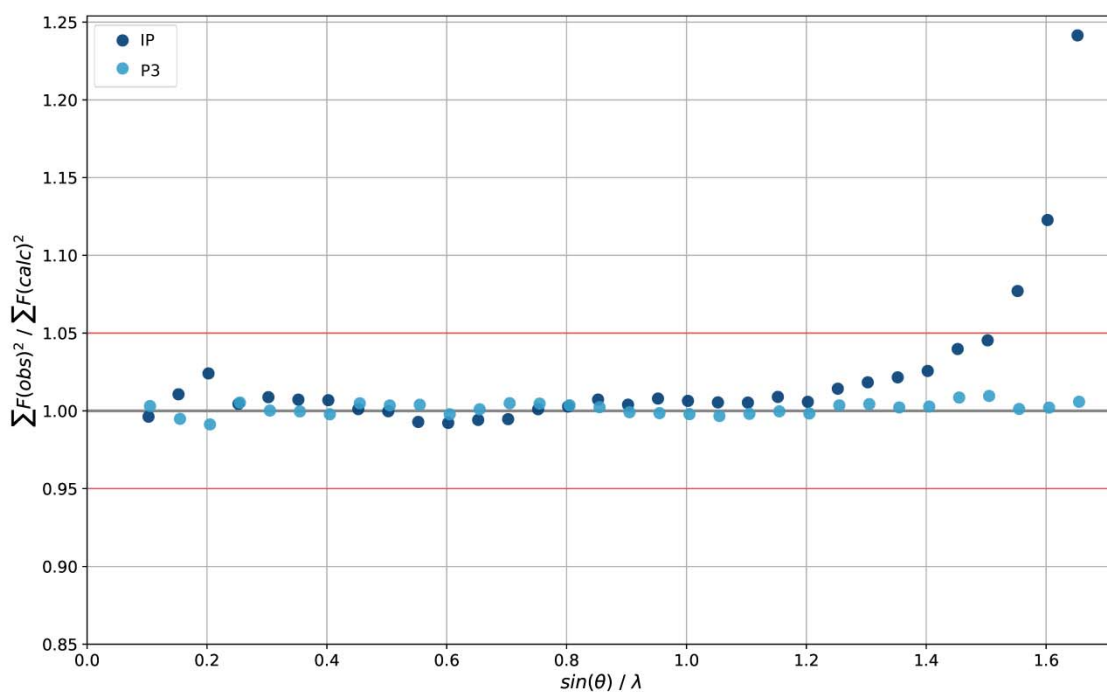**Figure S19** Scale-factor plot for models derived from image plate (IP) and Pilatus3 (P3) data.

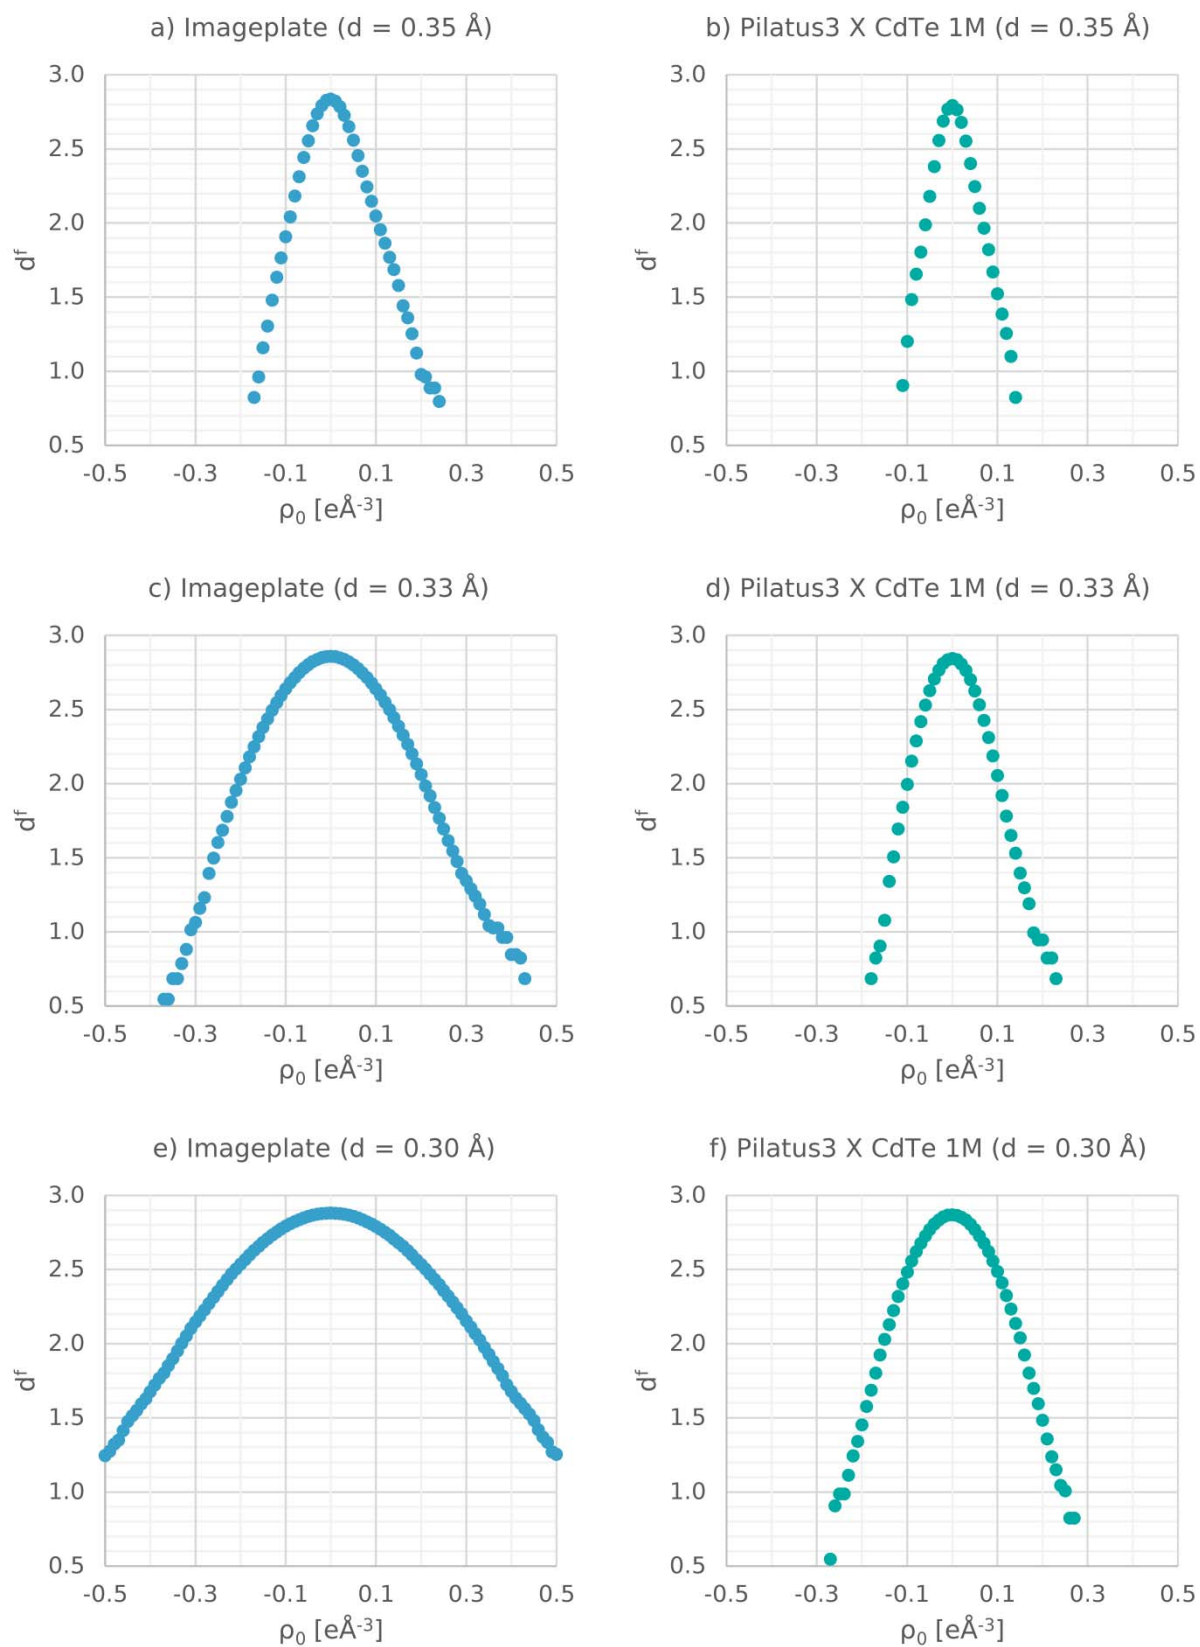

**Figure S20** Fractal dimension plot for models derived from image plate and Pilatus3 data



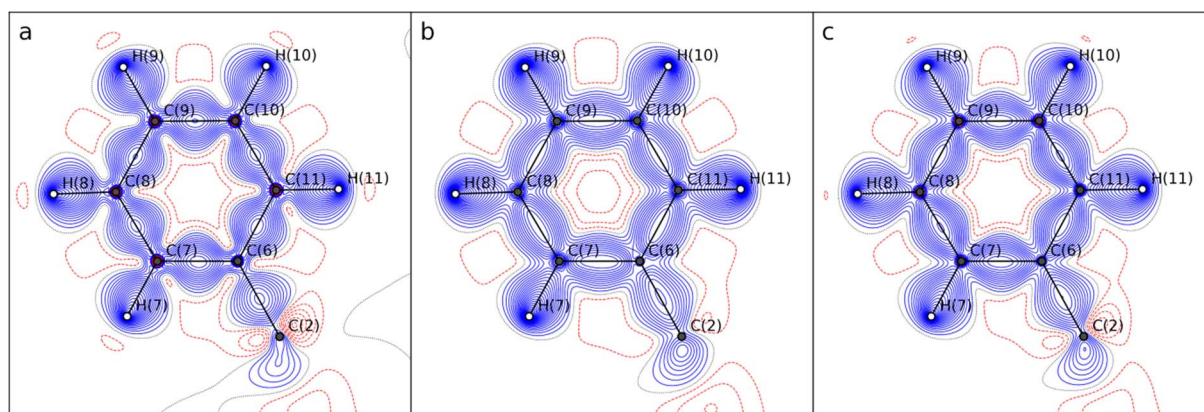

**Figure S21** Deformation density (contour level of  $0.05 \text{ e}\text{\AA}^{-3}$ ) for models derived from uncut experimental IP data (a), multipole projected theoretical density (b), uncut experimental P3 data (c). The term uncut refers to the following conditions:  $I/\sigma(I)$  cut-off of -3,  $I$  cut-off of -3 and resolution of  $1.67 \text{ \AA}^{-1}$ .

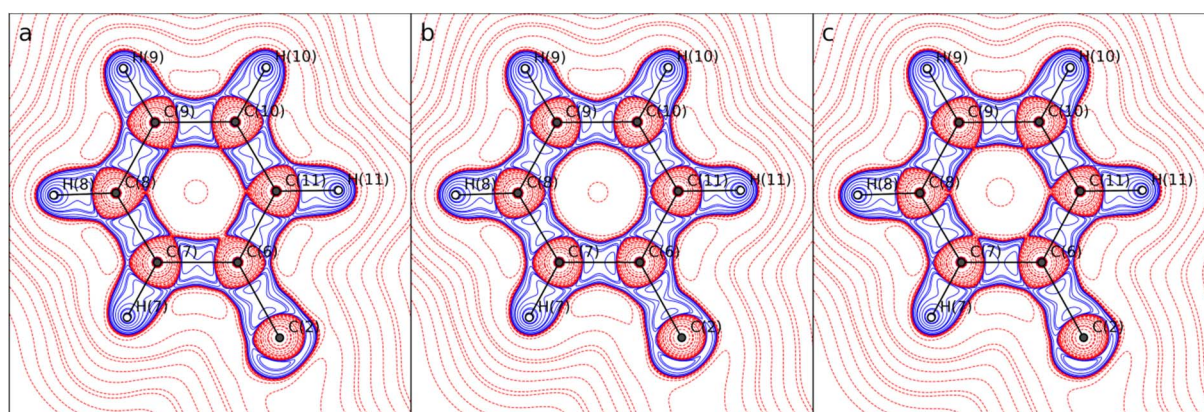

**Figure S22** Laplacian (the contour levels are:  $\pm a \cdot 10^b \text{ e}\text{\AA}^{-5}$ , with  $a = [1, 2, 4, 8]$ ,  $b = [-2, -1, 0, 1, 2, 3, 4]$ ) for models derived from restricted experimental IP data (a), multipole projected theoretical density (b), restricted experimental P3 data (c). The term restricted refers to the following conditions:  $I/\sigma(I)$  cut-off of 3 and resolution of  $1.43 \text{ \AA}^{-1}$ .

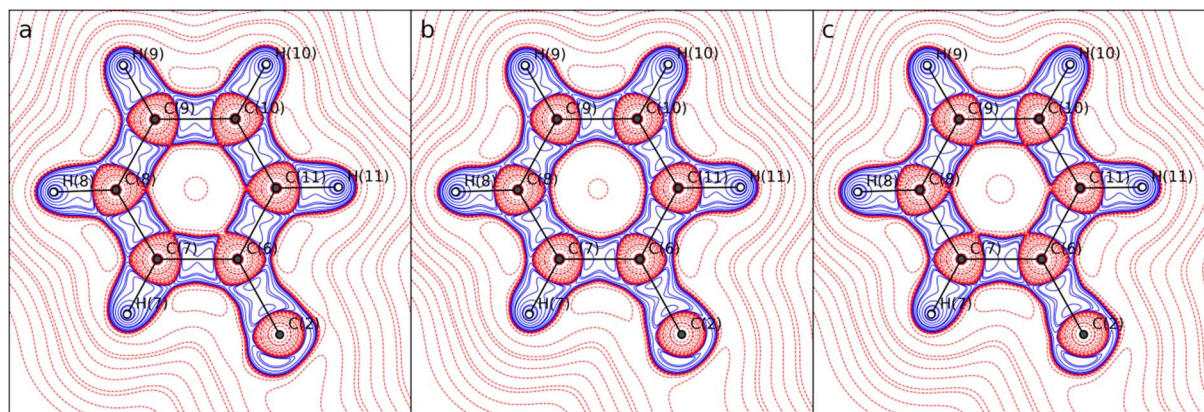

**Figure S23** Laplacian (the contour levels are:  $\pm a \cdot 10^b \text{ e}\text{\AA}^{-5}$ , with  $a = [1, 2, 4, 8]$ ,  $b = [-2, -1, 0, 1, 2, 3, 4]$ ) for models derived from uncut experimental IP data (a), multipole projected theoretical density (b), uncut experimental P3 data (c). The term uncut refers to the following conditions:  $I/\sigma(I)$  cut-off of -3,  $I$  cut-off of -3 and resolution of  $1.67 \text{ \AA}^{-1}$ .

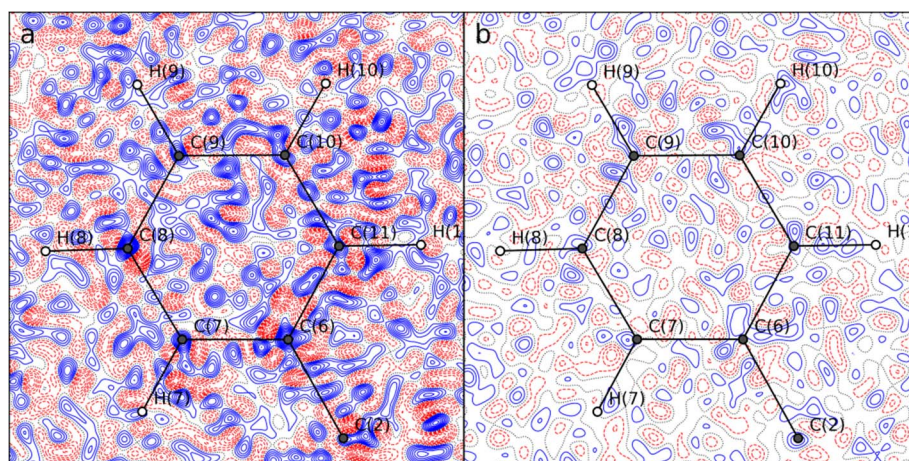

**Figure S24** Residual density contour map (contour level of  $0.05 \text{ e}\text{\AA}^{-3}$ ) for models derived from uncut experimental IP data (a) and uncut experimental P3 data (b). The term uncut refers to the following conditions:  $I/\sigma(I)$  cut-off of -3,  $I$  cut-off of -3 and resolution of  $1.67 \text{ \AA}^{-1}$ .
